# Supplementary material
Source: PubMed Central journal article supplement (PMC3560844)
Supplement: NIHMS431614-supplement-1_si_001.pdf [file NIHMS431614-supplement-1_si_001.pdf]

# Enantioselective Homocrotylboration of Aliphatic Aldehydes

Hongkun Lin,<sup>†</sup> Wenbo Pei,<sup>†</sup> Hao Wang,<sup>§</sup> Kendall N. Houk,<sup>\*,§</sup> and Isaac J. Krauss<sup>\*,†</sup>

<sup>†</sup>Department of Chemistry, Brandeis University, Waltham, Massachusetts 02454-9110, United States

<sup>§</sup>Department of Chemistry and Biochemistry, University of California, Los Angeles, California 90095-1569, United States

## Table of Contents

|                                                                  |         |
|------------------------------------------------------------------|---------|
| General Experimental Methods.....                                | S2      |
| Experimental Section .....                                       | S3-S12  |
| Mosher Ester Analysis of Absolute Configuration .....            | S12     |
| References and Notes.....                                        | S12     |
| Copies of <sup>1</sup> H NMR and <sup>13</sup> C NMR.....        | S13-S37 |
| HPLC and GC chromatograms .....                                  | S38-S44 |
| General computational methods.....                               | S45     |
| Figure S1. Optimized Structures of <b>16</b> and <b>19</b> ..... | S45     |
| Computational Data .....                                         | S46-S50 |

## General Experimental Methods

Reactions were carried out in oven-dried glassware under a nitrogen atmosphere and were stirred magnetically. The phrase "concentrated" refers to removal of solvents by means of a rotary evaporator attached to a Welch 1400 oil pump (bled to 5-300 mm Hg as needed) followed by removal of residual solvents at < 1 Torr on a vacuum manifold attached to a Welch 1400 vacuum pump. SiliaFlash<sup>®</sup> F60 (230-400 mesh) from SiliCycle<sup>®</sup> was used for flash column chromatography unless specifically indicated. Analytical thin layer chromatography (TLC) was performed using silica gel 60 F-254 pre-coated glass plates (0.25 mm). TLC plates were analyzed by short wave UV illumination, or by staining with iodine on silica or dipping in cerium-ammonium-molybdate (CAM) stain (40 g of ammonium pentamolybdate, 1.6 g of cerium (IV) sulfate, 800 mL of diluted sulfuric acid (1:9, with water, v/v)) or vanillin stain (15g vanillin in 250 mL ethanol and 2.5 mL concentrated sulfuric acid) and heating on a hot plate. Tetrahydrofuran (THF), dichloromethane (DCM), toluene and diethyl ether (Et<sub>2</sub>O) were obtained by degassing with argon and passage through activated alumina columns. <sup>1</sup>H and <sup>13</sup>C NMR spectra were recorded on a Varian Inova 400 MHz in CDCl<sub>3</sub> at ambient temperature unless otherwise indicated. Chemical shifts are reported in δ (ppm downfield from tetramethylsilane) and referenced to residual undeuterated solvents (7.26 for <sup>1</sup>H NMR and 77.16 for <sup>13</sup>C NMR). Coupling constants are reported in Hz with multiplicities denoted as s (singlet), d (doublet), dd (doublet of doublets), t (triplet), q (quartet), p (pentet), m (multiplet), app (apparent) and br (broad). IR spectra were recorded on a Varian 640-IR FT-IR spectrometer and are reported in wave numbers (cm<sup>-1</sup>). High performance liquid chromatography (HPLC) analyses were performed on an Agilent 1100 Series instrument equipped with a quaternary pump, using chiral columns (250 × 4.6 mm, 5 μm), monitored by UV absorption. Gas chromatography mass spectroscopy (GC-MS) analyses were performed on an Agilent 7890A GC System and 5975C VL MSD with Triple-Axis Detector. High resolution mass spectra (HRMS) were performed by Mass Spectrometry Laboratory, University of Illinois at Urbana-Champaign using electron impact (EI), chemical ionization (CI) or electrospray ionization (ESI). Optical rotation values were measured on a Jasco Digital Polarimeter using a cell with a path length of 1 dm (c given in g/100 mL).

## Preparation of S1

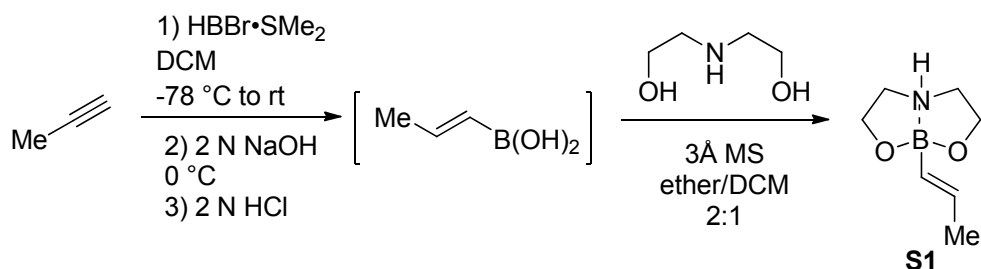

Propyne (roughly 4.7 mL, 82.5 mmol) was condensed to a Schlenk flask at -78 °C. A 0 °C solution of HBBr·SMe<sub>2</sub> (1 M in DCM, 75 mL) was cannulated to propyne, and then the flasked was firmly sealed, warmed to ambient temperature and stirred for 4 h.

The mixture was then cannulated to 112.5 mL 2 N NaOH at 0 °C, and stirred for 2 h. DCM phase was separated, and the aqueous phase was extracted with Et<sub>2</sub>O once. The pH of the aqueous phase was adjusted to 2-3 with 2 N HCl, and extracted with Et<sub>2</sub>O four times. All organic phases were combined, dried with MgSO<sub>4</sub>, filtered and concentrated *in vacuo*.

To the crude boronic acid in 75 mL DCM and 150 mL Et<sub>2</sub>O was added diethanolamine (7.2 mL, 75 mmol) and activated 3 Å molecular sieves (15 g). The mixture was stirred vigorously for 2 h, filtered through celite and concentrated. The crude oil was recrystallized from DCM/Et<sub>2</sub>O to afford **S1** (10.4 g, 89 %).<sup>1</sup>

<sup>1</sup>H NMR (400 MHz, CDCl<sub>3</sub>) δ 6.15–6.02 (m, 1H), 5.96 (dq, 1H, *J* = 17.4, 6.1), 5.49 (app dd, 1H, *J* = 17.4, 1.6), 4.03-3.72 (m, 4H), 3.34-3.16 (m, 2 H), 2.81-2.58 (m, 2H), 1.72 (dd, 3H, *J* = 6.2, 1.4); <sup>13</sup>C NMR (100 MHz, CDCl<sub>3</sub>) δ 135.2, 63.0, 51.3, 21.4, (C-B resonance missing due to boron broadening<sup>2</sup>); IR (neat) 3103, 2954, 2865, 1640, 1453, 1273, 1092, 1058, 990, 859, 729; HRMS (ESI) calcd for C<sub>7</sub>H<sub>15</sub>NO<sub>2</sub>B (M+H)<sup>+</sup>, 156.1196, found 156.1198.

Representative procedure for preparation of homocrotylation reagent. *ent-1* is illustrated.

(1) Preparation of *ent-S2*

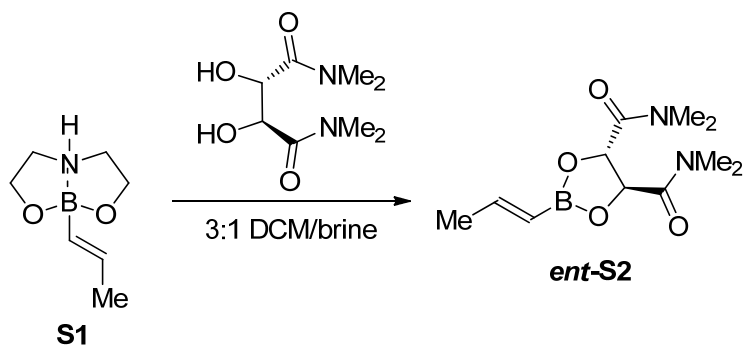

Although *ent-S2* can be prepared from condensation of tartaramide diol with commercially available *trans*-1-propen-1-ylboronic acid,<sup>3</sup> it is more economical on a large scale to prepare and use **S1**, which is very stable in storage. **S1** is converted to *ent-S2* as follows: (-)-N,N,N',N'-tetramethyl-D-tartaramide *ent-9* (2.0 g, 9.79 mmol) and **S1** (1.5 g, 9.79 mmol) were dissolved in 49 mL of DCM. To the mixture was added 16 mL of brine. The reaction was stirred for 30 min. The mixture was thoroughly shaken with brine (16 mL) and 1 N NaHSO<sub>4</sub> (12.2 mL, 12.2 mmol) in a separatory funnel. DCM phase was separated, and the aqueous phase was extracted with DCM three times. The combined organic phases were stirred with MgSO<sub>4</sub> for 4 h, filtered, concentrated *in vacuo* and pumped overnight, affording *ent-S2* (2.1 g, 84 %), which was used without further purification.<sup>4</sup>

<sup>1</sup>H NMR (400 MHz, CDCl<sub>3</sub>) δ 6.70 (dq, 1H, *J* = 17.9, 6.4), 5.58 (s, 2H), 5.45 (app dd, 1H, *J* = 17.9, 1.6), 3.22 (s, 6H), 2.98 (s, 6H), 1.85 (dd, 3H, *J* = 6.5, 1.6).

(2) Cyclopropanation

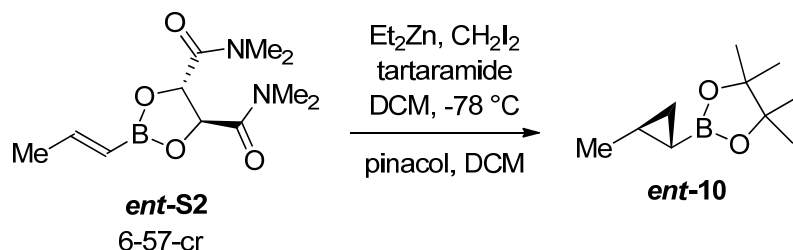

*ent-S2* (2.1 g, 8.18 mmol) and (-)-N,N,N',N'-tetramethyl-D-tartaramide *ent-9* (0.8357 g, 4.09 mmol) were dissolved in DCM (30 mL) at ambient temperature and allowed to stand for 2 h, generating solution A, which was then cooled to -78°C.

To a DCM (41 mL) solution of Et<sub>2</sub>Zn (2.52 mL, 24.6 mmol) was added CH<sub>2</sub>I<sub>2</sub> (2.97 mL, 36.8 mmol) dropwise at -78 °C, and this mixture was stirred vigorously for 10 min. (Ineffective stirring due to precipitation of zinc salt did not affect the reaction.) The -78 °C solution A was cannulated to carbenoid within 5 min, followed by DCM rinses (5.5 mL × 2). The mixture was stirred at -78 °C for 2 h. 80 mL of saturated aqueous NH<sub>4</sub>Cl solution was carefully added to quench the reaction. After addition of NH<sub>4</sub>Cl, the mixture was stirred at -78 °C for 5 min, taken out of the cooling bath and warmed to ambient temperature. After phase separation, the aqueous phase was extracted with DCM three times. The combined organic phase was dried with Na<sub>2</sub>SO<sub>4</sub>, filtered and concentrated to 20 mL. Pinacol (1.2 g, 9.82 mmol) was added to the crude mixture and the mixture was allowed to stay at ambient temperature and atmosphere overnight. After concentration, the crude mixture was flashed through a short silica column, eluted with 1:1 pentane/ether. The fractions containing product (stained with I<sub>2</sub> or CAM) were combined and concentrated to afford *ent-10* (1.4 g, 95 %). This material typically contains ~5 % CH<sub>2</sub> homologated product, and was used in the next step without purification. It is important to achieve full conversion, as any unreacted alkenylboronate will be homologated to crotylboronate in the next step. The crotylboronate contaminant is undesirable, as it is more reactive than **1**, leading to crotylated impurities in the homocrotylation products.

<sup>1</sup>H NMR (400 MHz, CDCl<sub>3</sub>) δ 1.21 (s, 12H), 1.07 (d, 3H, *J* = 5.8), 0.99-0.88 (m, 1H), 0.70-0.62 (m, 1H), 0.35 (ddd, 1H, *J* = 9.4, 5.1, 3.3), -0.46 (dt, 1H, *J* = 9.4, 5.7); <sup>13</sup>C NMR (100 MHz, CDCl<sub>3</sub>) δ 82.9, 24.86, 24.81, 20.1, 12.8-12.6 (br), 12.4; IR (neat) 2978, 1420, 1314, 1218, 1146, 856; HRMS (EI) calcd for C<sub>10</sub>H<sub>19</sub>O<sub>2</sub>B (M<sup>+</sup>) 182.1478, found 182.1480. *ent-10* [ $\alpha$ ]<sub>D</sub><sup>20</sup> = +42.7° (c 2.06, DCM). Data for **10**: identical to that for *ent-10*, except for optical rotation [ $\alpha$ ]<sub>D</sub><sup>20</sup> = -38.4° (c 0.88, DCM).

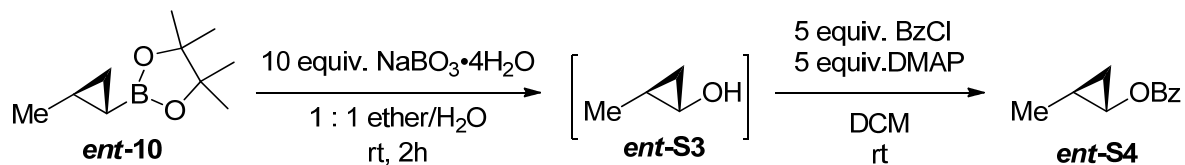

ee % analysis: **ent-10** was oxidized to the corresponding alcohol **ent-S3** with 10 equiv. of  $\text{NaBO}_3 \cdot 4\text{H}_2\text{O}$  suspended in ether/water biphasic mixture for 2 h. Then the oxidant was filtered and the phases were allowed to separate. The aqueous phase was extracted with  $\text{Et}_2\text{O}$  twice. The combined organic phases were dried over  $\text{MgSO}_4$ , filtered and concentrated. This crude mixture was benzoylated with 5 equiv. of benzoyl chloride and 5 equiv. of 4-(dimethylamino)pyridine (DMAP) in DCM overnight. The ee % of **ent-S4** was determined as 98 % by chiral HPLC (Daicel Chiralpak AS-H, hexanes, 0.5 mL/min, 220 nm),  $t_R$  (major) = 18.72 min,  $t_R$  (minor) = 16.62 min. -97 % ee for **S4**.

### (3) Homologation

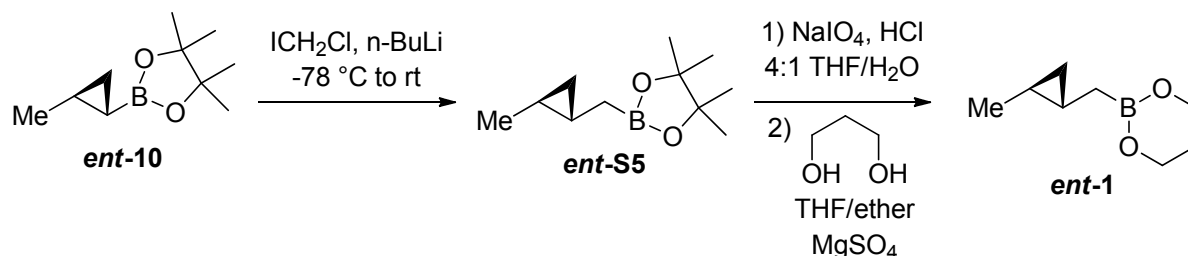

To a mixture of **ent-10** (1.2g, 6.4 mmol) and  $\text{ICH}_2\text{Cl}$  (925  $\mu\text{L}$ , 12.7 mmol) in 51 mL of THF at  $-78 \text{ }^\circ\text{C}$  was added n-BuLi (2.5 M in hexanes, 5.1 mL) with a syringe pump over 1 h. The mixture was stirred at  $-78 \text{ }^\circ\text{C}$  for an additional 10 min before being allowed to warm to ambient temperature and stirred for an additional 4 h. Saturated aqueous  $\text{NH}_4\text{Cl}$  solution (50 mL) was added to the mixture. The organic phase was separated and the aqueous phase was extracted with  $\text{Et}_2\text{O}$  three times. The combined organic phases were dried with  $\text{Na}_2\text{SO}_4$ , filtered and concentrated. The crude mixture was flashed through a short silica column, eluted with 1:1 pentane/ether. The fractions containing product (stained with  $\text{I}_2$  or CAM) were combined and concentrated to afford **ent-S5** (910 mg, 73 %). **S5** obtained by this route contains no *cis*-impurity, in contrast with **rac-S5** obtained by direct

cyclopropanation of commercial *trans*-crotylboronate from Aldrich. NMR, IR and HRMS data for *ent*-**S5** was identical to our previous report for *rac*-**S5**.<sup>5</sup>

*ent*-**S5**  $[\alpha]_D^{20} = +20.2^\circ$  (c 0.78, DCM). **S5**  $[\alpha]_D^{20} = -20.3^\circ$  (c 1.62, DCM).

Conversion from *ent*-**S5** to *ent*-**1** was performed according to our previous report.<sup>5</sup> NMR, IR and HRMS data for *ent*-**1** was identical to our previous report for *rac*-**1**.<sup>5</sup>

*ent*-**1**  $[\alpha]_D^{20} = +27.6^\circ$  (c 0.88, DCM). **1**  $[\alpha]_D^{20} = -24.9^\circ$  (c 1.02, DCM).

### Homocrotylboration

All reactions were performed using 0.1 mmol of aldehydes **9** according to the same procedure as in our previous report,<sup>5</sup> for a period indicated in Table 1. ee's % were determined by chiral HPLC directly for compounds **12a**, **12f** and **12g**, or after benzylation with benzoyl chloride (5 equiv.) and DMAP (10 equiv.) in DCM overnight for compounds **12b**, **12c**, **12d**, and **12e**.

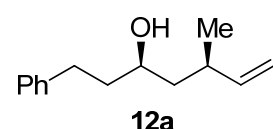

17.0 mg, 83 % yield after flash column chromatography, 10 % to 15 % ethyl acetate/hexanes. 97 % ee (Daicel Chiralcel OD-H, 5 % isopropanol/hexanes, 0.5 mL/min, 210 nm),  $t_R$  (major) = 21.31 min,  $t_R$  (minor) = 14.27 min. NMR

and IR data was identical to the literature.<sup>6</sup> HRMS (ESI) calcd for  $C_{14}H_{20}ONa$  (M+Na)<sup>+</sup> 227.1412, found 227.1422.  $[\alpha]_D^{20} = +5.8^\circ$  (c 0.85, DCM).

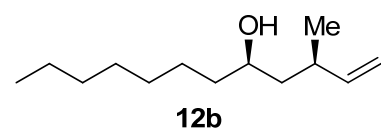

17.6 mg, 89 % yield after flash column chromatography, 10 % to 15 % ethyl acetate/hexanes. 97 % ee (Daicel Chiralpak AD-H, hexanes, 0.5 mL/min, 220 nm),  $t_R$  (major) = 16.01 min,  $t_R$  (minor) = 14.39 min.

<sup>1</sup>H NMR (400 MHz, CDCl<sub>3</sub>)  $\delta$  5.68 (ddd, 1H,  $J = 17.4, 10.2, 8.2$ ), 5.03 (ddd, 1H,  $J = 17.2, 1.8, 1.0$ ), 4.96 (dd, 1H,  $J = 10.3, 1.6$ ), 3.67-3.58 (m, 1H), 2.50-2.34 (m, 1H), 1.48-1.17 (m, 15H), 1.02 (d, 3H,  $J = 6.8$ ), 0.88 (t, 3H,  $J = 6.8$ ); <sup>13</sup>C NMR (100 MHz, CDCl<sub>3</sub>)  $\delta$  144.4, 113.5, 69.9, 44.4, 38.2, 34.9,

32.0, 29.8, 29.4, 25.8, 22.8, 21.4, 14.2; IR (neat) 3327, 3076, 2923, 2858, 1641, 1458, 1126, 998, 914; HRMS (EI) calcd for C<sub>13</sub>H<sub>25</sub>O (M-[H]<sup>+</sup>)<sup>+</sup> 197.1906, found 197.1905.  $[\alpha]_D^{20} = -14.9^\circ$  (c 0.65, DCM).

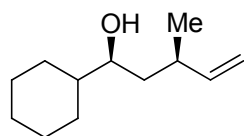

**12c**

16.2 mg, 89 % yield after flash column chromatography, 10 % ethyl acetate/hexanes. 97 % ee (Daicel Chiralcel OD-H, hexanes, 0.5 mL/min, 220 nm),  $t_R$  (major) = 21.75 min,  $t_R$  (minor) = 15.86 min.

<sup>1</sup>H NMR (400 MHz, CDCl<sub>3</sub>)  $\delta$  5.65 (ddd, 1H,  $J = 17.2, 10.2, 8.4$ ), 5.02 (ddd, 1H,  $J = 17.2, 1.9, 1.0$ ), 4.96 (dd, 1H,  $J = 10.2, 1.8$ ), 3.44-3.35 (m, 1H), 2.48-2.35 (m, 1H), 1.88-1.56 (m, 4H + water), 1.53-0.90 (m + d, 10H + 3H,  $J = 6.8$ ); <sup>13</sup>C NMR (100 MHz, CDCl<sub>3</sub>)  $\delta$  144.3, 113.6, 73.9, 44.3, 41.2, 35.0, 29.3, 28.0, 26.7, 26.5, 26.4, 21.6; IR (neat) 3361, 3075, 2922, 2854, 1640, 1449, 995, 911; HRMS (EI) calcd for C<sub>12</sub>H<sub>22</sub>O (M<sup>+</sup>) 182.1671, found 182.1670.  $[\alpha]_D^{20} = -27.9^\circ$  (c 0.66, DCM).

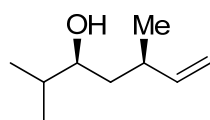

**12d**

83 % NMR yield, 10.2 mg, 72 % isolated yield after flash column chromatography, eluted with 3:1 pentane/Et<sub>2</sub>O. 98 % ee (Regis (R,R)-Whelk-O 1, Kromasil, hexanes, 0.5 mL/min, 220 nm),  $t_R$  (major) = 25.38 min,  $t_R$  (minor) = 23.91 min.

<sup>1</sup>H NMR (400 MHz, CDCl<sub>3</sub>)  $\delta$  5.66 (ddd, 1H,  $J = 17.2, 10.2, 8.4$ ), 5.03 (ddd, 1H,  $J = 17.2, 1.7, 1.0$ ), 4.97 (dd, 1H,  $J = 10.1, 1.7$ ), 3.44-3.35 (m, 1H), 2.48-2.34 (m, 1H), 1.62 (m, 1H), 1.46-1.30 (m, 3H), 1.03 (d, 3H,  $J = 6.6$ ), 0.905 (d, 3H,  $J = 6.8$ ), 0.902 (d, 3H,  $J = 6.8$ ); <sup>13</sup>C NMR (100 MHz, CDCl<sub>3</sub>)  $\delta$  144.3, 113.6, 74.4, 41.1, 35.1, 34.1, 21.6, 18.8, 17.4; IR (neat) 3389, 3077, 2960, 2878, 1639, 1460, 1134, 994, 914; HRMS (CI) calcd for C<sub>9</sub>H<sub>17</sub>O (M-[H]<sup>+</sup>)<sup>+</sup> 141.1280, found 141.1280.  $[\alpha]_D^{20} = -49.2^\circ$  (c 0.27, DCM).

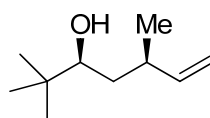

**12e**

84 % NMR yield, 9.7 mg, 62 % isolated yield after flash column chromatography, 10:1 pentane/Et<sub>2</sub>O. 98 % ee (Regis (R,R)-Whelk-O 1, Kromasil, hexanes, 0.5 mL/min, 220 nm),  $t_R$  (major) = 17.66 min,  $t_R$  (minor) = 20.45 min.



$^1\text{H}$  NMR (400 MHz,  $\text{CDCl}_3$ )  $\delta$  5.62 (ddd, 1H,  $J = 17.2, 10.2, 8.5$ ), 5.03 (ddd, 1H,  $J = 17.2, 1.9, 1.0$ ), 4.97 (dd, 1H,  $J = 10.2, 1.8$ ), 3.23 (br d, 1H,  $J = 10.0$ ), 2.50-2.34 (m, 1H), 1.47-1.22 (m, 3H), 1.04 (d, 3H,  $J = 6.8$ ), 0.88 (s, 9H);  $^{13}\text{C}$  NMR (100 MHz,  $\text{CDCl}_3$ )  $\delta$  144.2, 113.8, 77.4, 38.6, 35.4, 34.8, 25.8, 21.9; IR (neat) 3395, 3077, 2960, 2873, 1643, 1468, 1394, 1263, 1063, 1007, 918, 821; HRMS (CI) calcd for  $\text{C}_{10}\text{H}_{19}\text{O}$  ( $\text{M}-[\text{H}]^+$ ) 155.1436, found 155.1436.  $[\alpha]_{\text{D}}^{20} = -50.6^\circ$  (c 0.45, DCM).

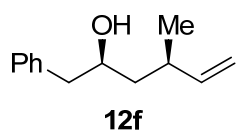

15.6 mg, 82 % yield after flash column chromatography, 10 % to 15 % ethyl acetate/hexanes. 97 % ee (Daicel Chiralpak AS-H, 2 % isopropanol/hexanes, 1 mL/min, 210 nm),  $t_{\text{R}}$  (major) = 5.53 min,  $t_{\text{R}}$  (minor) = 6.03 min.

$^1\text{H}$  NMR (400 MHz,  $\text{CDCl}_3$ )  $\delta$  7.36-7.27 (m, 2H), 7.27-7.17 (m, 3H), 5.65 (ddd, 1H,  $J = 17.4, 10.2, 8.2$ ), 5.01 (ddd, 1H,  $J = 17.2, 1.6, 0.8$ ), 4.95 (ddd, 1H,  $J = 10.1, 1.7$ ), 3.91-3.79 (m, 1H), 2.78 (dd, 1H,  $J = 13.5, 4.4$ ), 2.66 (dd, 1H,  $J = 13.5, 8.4$ ), 2.51-2.39 (m, 1H), 1.65-1.38 (m, 3H + water), 1.03 (d, 3H,  $J = 6.8$ );  $^{13}\text{C}$  NMR (100 MHz,  $\text{CDCl}_3$ )  $\delta$  144.1, 138.7, 129.6, 128.7, 126.6, 113.7, 70.6, 44.7, 43.8, 34.9, 21.3; IR (neat) 3412, 3071, 3027, 2959, 2922, 1641, 1604, 1494, 1451, 1078, 1020, 913, 740; HRMS (EI) calcd for  $\text{C}_{13}\text{H}_{18}\text{O}$  ( $\text{M}^+$ ) 190.1358, found 190.1357.  $[\alpha]_{\text{D}}^{20} = +1.7^\circ$  (c 0.62, DCM).

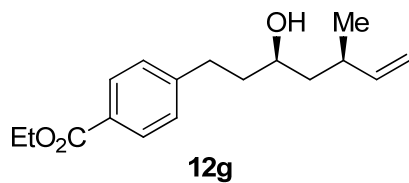

24.5 mg, 89 % yield after flash column chromatography, 8:1 ethyl acetate/hexanes. 97 % ee (Daicel Chiralpak AS-H, 2 % isopropanol/hexanes, 1 mL/min, 210 nm),  $t_{\text{R}}$  (major) = 17.44 min,  $t_{\text{R}}$  (minor) = 12.34 min.

$^1\text{H}$  NMR (400 MHz,  $\text{CDCl}_3$ )  $\delta$  7.96 (app d, 2H,  $J = 8.2$ ), 7.25 (app d, 2H,  $J = 8.2$ ), 5.66 (ddd, 1H,  $J = 17.2, 10.2, 8.2$ ), 5.03 (ddd, 1H,  $J = 17.2, 1.6, 1.0$ ), 4.96 (dd, 1H,  $J = 10.2, 1.7$ ), 4.36 (q, 2H,  $J = 7.1$ ), 3.73-3.62 (m, 1H), 2.84 (d of app t, 1H,  $J = 13.7, \sim 8.0$ ), 2.71 (d of app t, 1H,  $J = 13.7, \sim 8.2$ ), 2.48-2.33 (m, 1H), 1.87-1.33 (m + t, 5H + 3H + water,  $J = 7.1$ ), 1.02 (d, 3H,  $J = 6.8$ );  $^{13}\text{C}$  NMR (100 MHz,  $\text{CDCl}_3$ )  $\delta$  166.8, 147.8, 144.1, 129.8, 128.5, 128.2, 113.7, 69.2, 60.9, 44.4, 39.3, 34.9, 32.2, 21.2,

14.5; IR (neat) 3484, 3073, 2965, 2926, 2872, 1711, 1610, 1273, 1105, 914; HRMS (ESI) calcd for  $C_{17}H_{25}O_3$  (M+H)<sup>+</sup> 277.1804, found 277.1806.  $[\alpha]_D^{20} = +11.2^\circ$  (c 1.22, DCM).

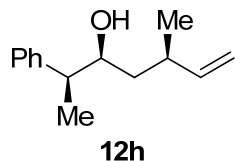

dr (>20:1) was determined using material partially purified by column chromatography; 10 % ethyl acetate/hexanes, combining all product-containing fractions, together with some fractions before and after. This mixture was then analyzed by LC-MS (ACQUITY UPLC<sup>®</sup> BEH300 C18 column, 50:50:0.1 acetonitrile/water/formic acid, 0.35 mL/min, 258nm). A second column (10 % ethyl acetate/hexanes) was then performed to afford analytically pure material, 16.9 mg **12h**, 83 % yield.

<sup>1</sup>H NMR (400 MHz, CDCl<sub>3</sub>) δ 7.37-7.27 (m, 2H), 7.27-7.15 (m, 3H), 5.57 (ddd, 1H, *J* = 17.2, 10.2, 8.4), 4.98 (ddd, 1H, *J* = 17.2, 1.7, 1.0), 4.94 (dd, 1H, *J* = 10.2, 1.8), 3.71 (ddd, 1H, *J* = 9.6, 6.1, 2.9), 2.74 (app p, 1H, *J* = 6.8), 2.45-2.32 (m, 1H), 1.65-1.20 (m + d, 3H + 3H + water, *J* = 7.0), 0.96 (d, 3H, *J* = 6.8); <sup>13</sup>C NMR (100 MHz, CDCl<sub>3</sub>) δ 144.7, 144.1, 128.6, 128.0, 126.5, 113.7, 74.0, 46.3, 41.7, 35.1, 21.5, 16.0; IR (neat) 3391, 3073, 3027, 2963, 2928, 2876, 1640, 1603, 1493, 1453, 1001, 913, 760; HRMS (ESI) calcd for  $C_{14}H_{20}ONa$  (M+Na)<sup>+</sup> 227.1412, found 227.1420.  $[\alpha]_D^{20} = -5.9^\circ$  (c 0.84, DCM).

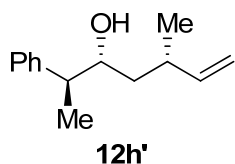

dr (>20:1) was determined using material partially purified by column chromatography; 10 % ethyl acetate/hexanes combining all product-containing fractions, together with some fractions before and after. This mixture was then analyzed by LC-MS (ACQUITY UPLC<sup>®</sup> BEH300 C18 column, 50:50:0.1 acetonitrile/water/formic acid, 0.35 mL/min, 258nm). A second column (10 % ethyl acetate/hexanes) was then performed to afford 15.9 mg **12h'**, 78 % yield, eluted with 10 % ethyl acetate/hexanes.

<sup>1</sup>H NMR (400 MHz, CDCl<sub>3</sub>) δ 7.35-7.28 (m, 2H), 7.28-7.20 (m, 3H), 5.65 (ddd, 1H, *J* = 17.2, 10.2, 8.2), 5.01 (ddd, 1H, *J* = 17.2, 1.8, 0.8), 4.96 (dd, 1H, *J* = 10.2, 1.6), 3.72-3.62 (m, 1H), 2.70 (app p, 1H, *J* = 7.0), 2.51-2.38 (m, 1H), 1.66-1.19 (m + d, 3H + 3H + water, *J* = 7.0), 1.01 (d, 3H, *J* = 6.8);

$^{13}\text{C}$  NMR (100 MHz,  $\text{CDCl}_3$ )  $\delta$  144.1, 143.7, 128.6, 128.3, 126.8, 113.7, 74.0, 46.7, 41.8, 34.9, 21.6, 18.0; IR (neat) 3443, 3071, 3027, 2964, 2875, 1640, 1602, 1452, 1005, 911, 762; HRMS (ESI) calcd for  $\text{C}_{14}\text{H}_{20}\text{ONa}$  ( $\text{M}+\text{Na}$ ) $^+$  227.1412, found 227.1415.  $[\alpha]_{\text{D}}^{20} = +21.2^\circ$  (c 0.80, DCM).

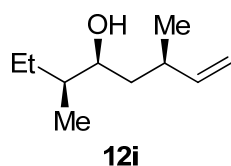

87 % NMR yield. dr (>99:1) was analyzed by silylation of the crude mixture (no concentration was performed to avoid any potential loss of diastereomers) with N-methyl-N-(trimethylsilyl)trifluoroacetamide at 70 °C for 1 h, followed by GC-MS analysis (Agilent 19091S-433 HP-5MS 5% phenyl-methyl-siloxane capillary column, 30 m  $\times$  250  $\mu\text{m}$   $\times$  0.25  $\mu\text{m}$ , 1 mL/min, 1 min at 60 °C, then 0.1 °C/min to 64 °C). Flash column chromatography was performed to afford 11.8 mg **12i**, 76 % isolated yield, eluted with 10:1 to 20:3 pentane/ $\text{Et}_2\text{O}$ .

$^1\text{H}$  NMR (400 MHz,  $\text{CDCl}_3$ )  $\delta$  5.66 (ddd, 1H,  $J = 17.2, 10.3, 8.4$ ), 5.03 (ddd, 1H,  $J = 17.2, 1.8, 1.0$ ), 4.96 (dd, 1H,  $J = 10.3, 1.8$ ), 3.56 (d of app t, 1H,  $J = 9.6, 3.1$ ), 2.46-2.33 (m, 1H), 1.70-1.29 (m, 4H), 1.26 (br s, 1H), 1.23-1.09 (m, 1H), 1.03 (d, 3H,  $J = 6.8$ ), 0.90 (t, 3H,  $J = 7.4$ ), 0.88 (d, 3H,  $J = 6.8$ );  $^{13}\text{C}$  NMR (100 MHz,  $\text{CDCl}_3$ )  $\delta$  144.3, 113.6, 72.7, 41.4, 40.7, 35.1, 26.0, 21.5, 13.6, 12.0; IR (neat) 3360, 3078, 2962, 2929, 2874, 1638, 1458, 1379, 1136, 997, 913; HRMS (CI) calcd for  $\text{C}_{10}\text{H}_{19}\text{O}$  ( $\text{M}[\text{H}]^+$ ) 155.1436, found 155.1437.  $[\alpha]_{\text{D}}^{20} = -41.0^\circ$  (c 0.56, DCM).

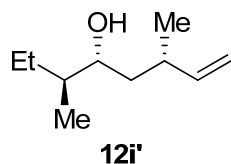

96 % NMR yield. dr (>99 : 1) was analyzed by silylation of crude mixture (no concentration was performed to avoid any potential loss of diastereomers) with N-methyl-N-(trimethylsilyl)trifluoroacetamide at 70 °C for 1 h, followed by GC-MS analysis (Agilent 19091S-433 HP-5MS 5% phenyl-methyl-siloxane capillary column, 30 m  $\times$  250  $\mu\text{m}$   $\times$  0.25  $\mu\text{m}$ , 1 mL/min, 1 min at 60 °C, then 0.1 °C/min to 64 °C). Flash column chromatography was performed to afford 12.7 mg **12i'**, 81 % isolated yield, eluted with 10:1 to 20:3 pentane/ $\text{Et}_2\text{O}$ .

$^1\text{H}$  NMR (400 MHz,  $\text{CDCl}_3$ )  $\delta$  5.65 (ddd, 1,  $J = 17.2, 10.2, 8.3$ ), 5.03 (ddd, 1,  $J = 17.2, 1.8, 0.8$ ), 4.97 (dd, 1,  $J = 10.2, 1.6$ ), 3.54-3.46 (m, 1), 2.48-2.35 (m, 1), 1.66-1.23 (m, 5), 1.23-1.06 (m, 1), 1.03 (d, 3,  $J = 6.6$ ), 0.90 (t, 3,  $J = 7.4$ ), 0.87 (t, 3,  $J = 6.7$ );  $^{13}\text{C}$  NMR (100 MHz,  $\text{CDCl}_3$ )  $\delta$  144.3, 113.7, 73.4, 41.1, 40.3, 35.1, 25.0, 21.7, 14.7, 11.9; IR (neat) 3358, 3076, 2962, 2928, 2874, 1642, 1459, 1379, 1138, 994, 912; HRMS (CI) calcd for  $\text{C}_{10}\text{H}_{19}\text{O}$  ( $\text{M}-[\text{H}]^+$ ) $^+$  155.1436, found 155.1437.  $[\alpha]_{\text{D}}^{20} = +29.4^\circ$  (c 0.64, DCM).

### Mosher Ester Analysis of Absolute Configuration

*R*- and *S*- MTPA esters were prepared from **12d**.<sup>7</sup> The following ( $\delta_S - \delta_R$ ) values were observed between the two derivatives, indicating the *S* configuration of the C–O stereocenter. The absolute configuration of all other homocrotylation products is assigned by analogy to **12d**.

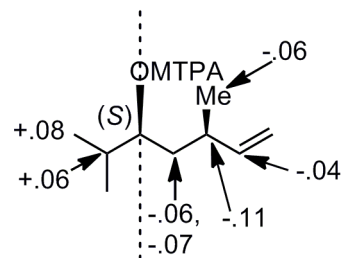

### References and Notes

- [1] Chatette, A. B.; Lebel, H. *Org Synth*, **2004**, *Coll. Vol. 10*, 613; **1999**, 76, 86.
- [2] Due to quadrupole broadening, the NMR signal for carbon directly attached to boron is often too weak to be observed. See: Wrackmeyer, B. *Prog. Nucl. Magn. Reson. Spectrosc.* **1979**, *12*, 227-259.
- [3] Tanino, K.; Takahashi, M.; Tomata, Y.; Tokura, H.; Uehara, T.; Narabu, T.; Miyashita, M. *Nat. Chem.* **2011**, *3*, 484-488.
- [4] Roush, W. R.; Grover, P. T. *J. Org. Chem.* **1995**, *60*, 3806-3813.
- [5] Pei, W.; Krauss, I. J. *J. Am. Chem. Soc.* **2011**, *133*, 18514-18517.
- [6] Tamaru, Y.; Kimura, M. *Org Synth*, **2009**, *Coll. Vol. 11*, 327-335; **2006**, *83*, 88-96.
- [7] Hoye, T. R.; Jeffrey, C. S.; Shao, F. *Nat. Protocols* **2007**, *2*, 2451-2458.

$^1\text{H}$  NMR (400 MHz) of **S1**

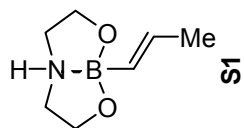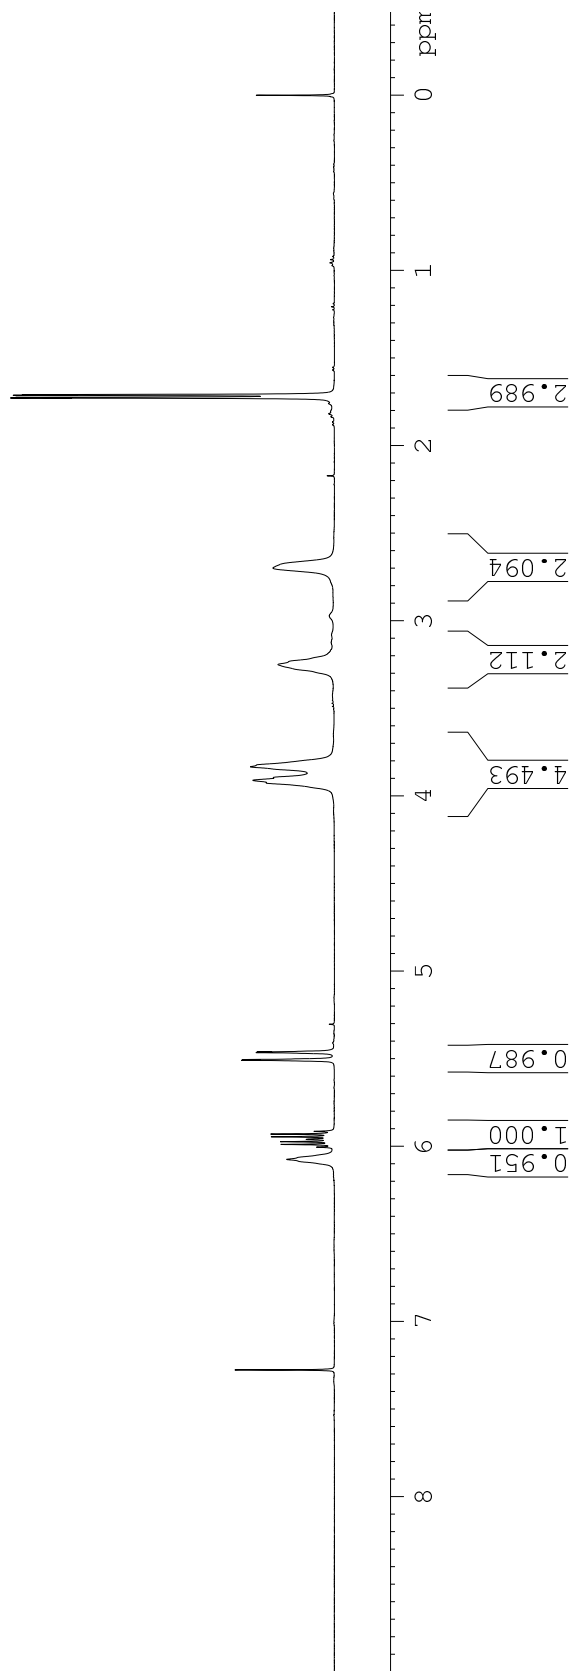

$^{13}\text{C}$  NMR (100 MHz) of **S1**

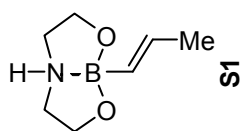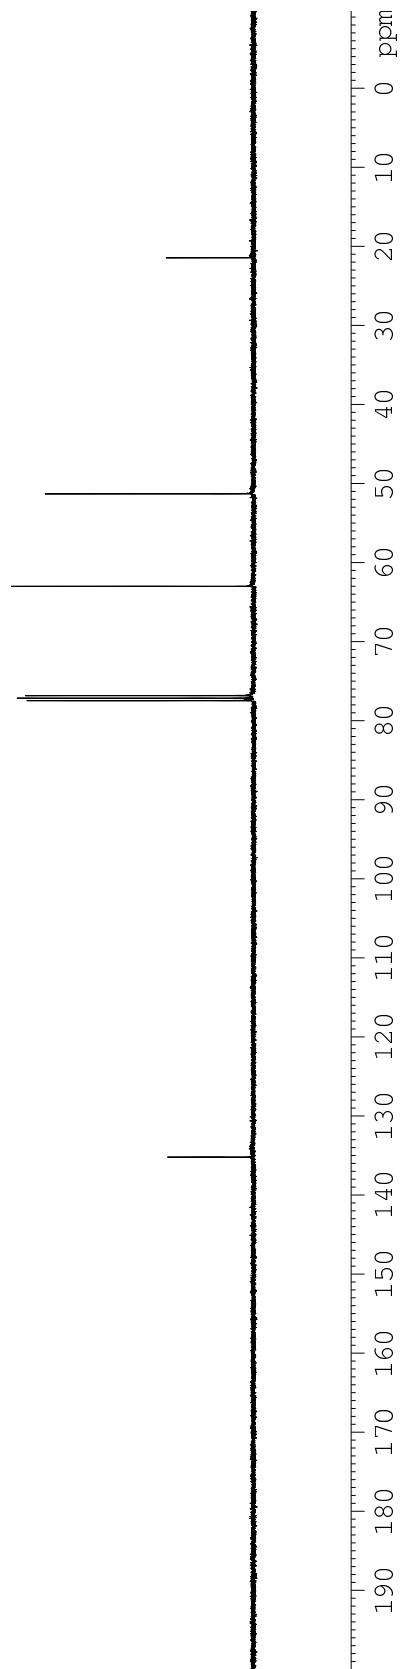

$^1\text{H}$  NMR (400 MHz) of **S2**

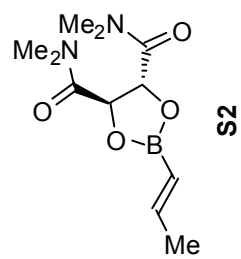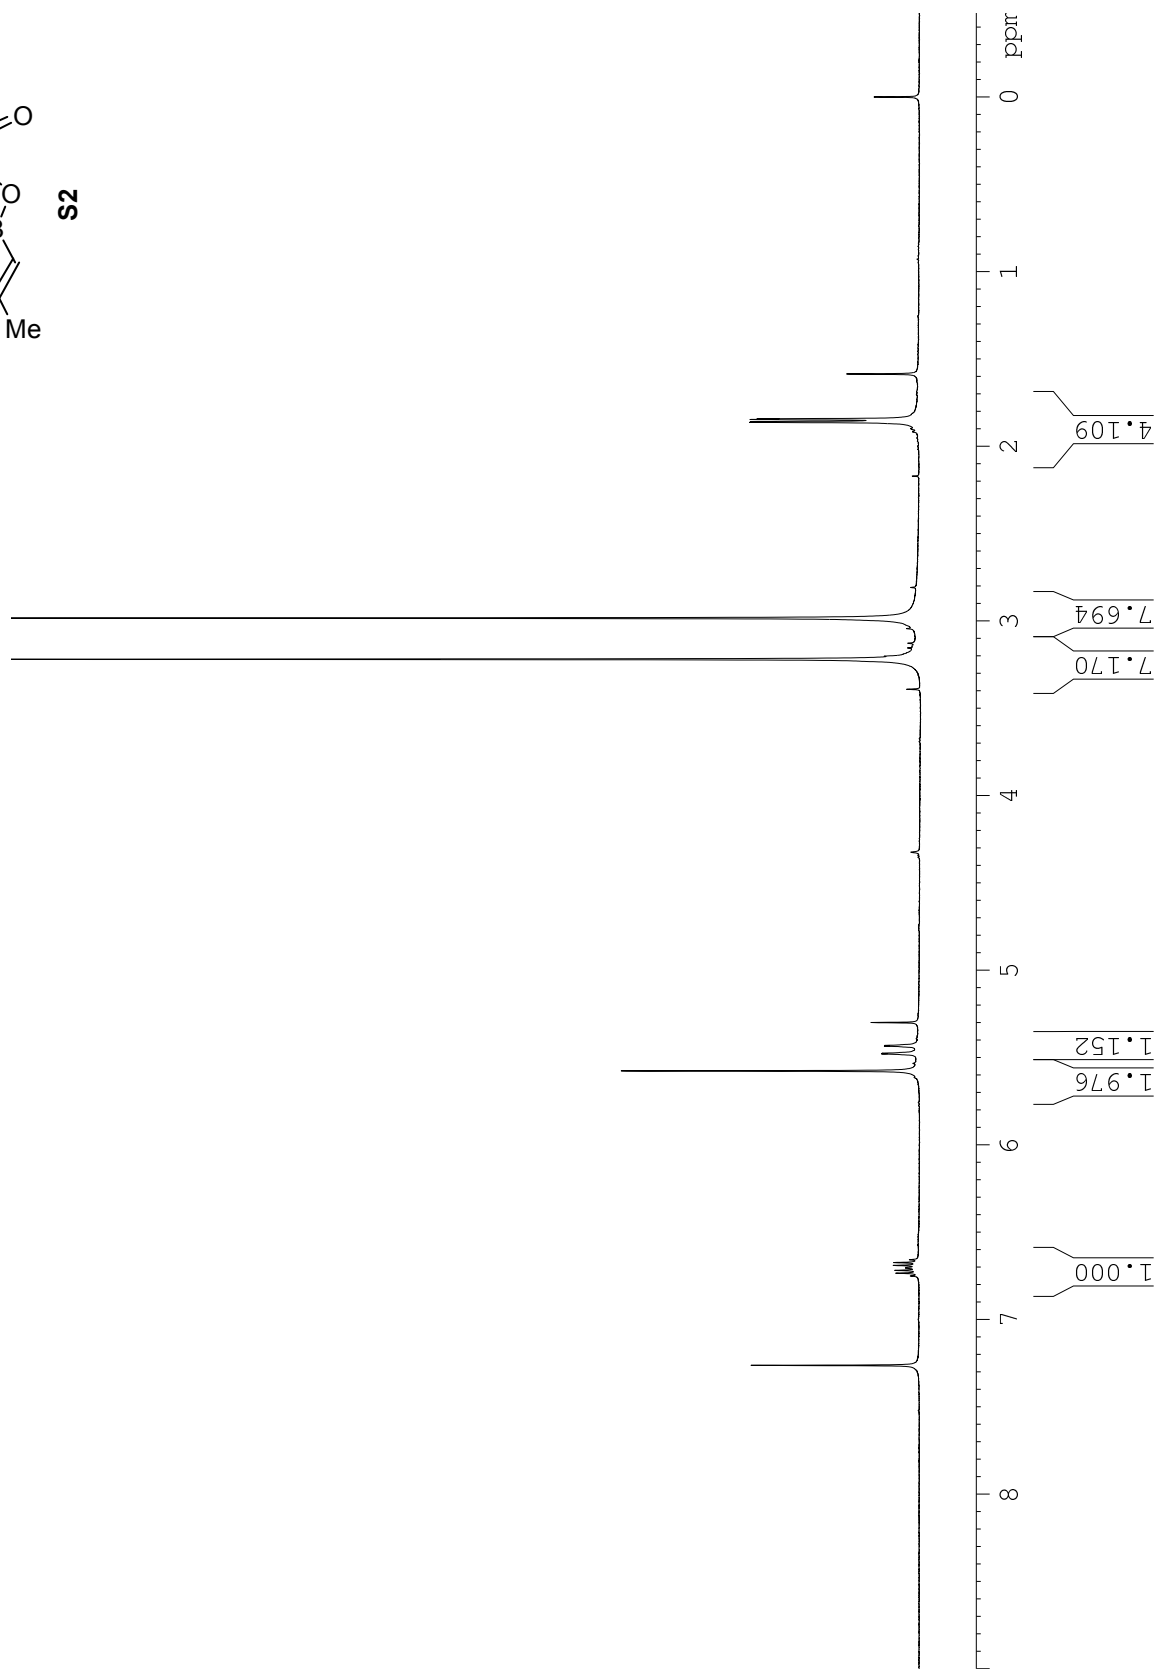

$^1\text{H}$  NMR (400 MHz) of **10**

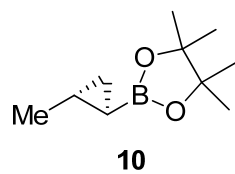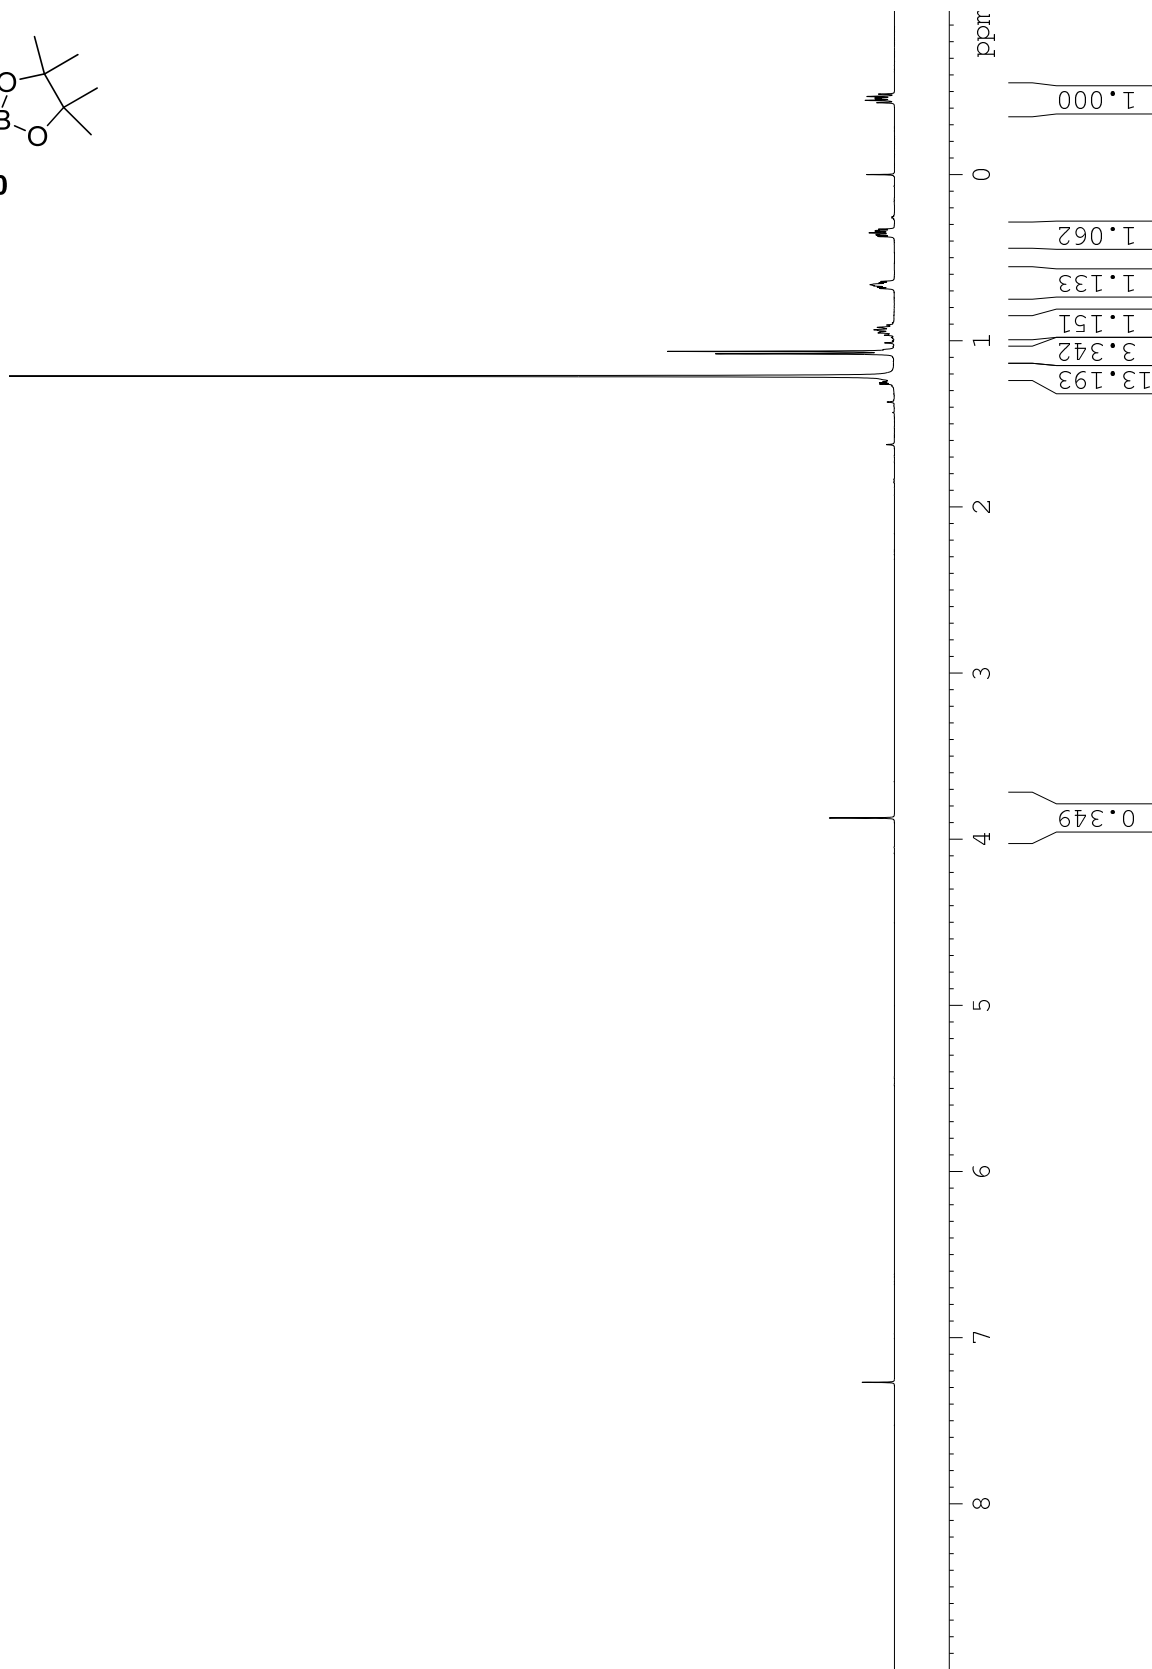



$^{13}\text{C}$  NMR (100 MHz) of **10**

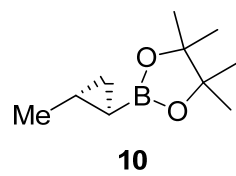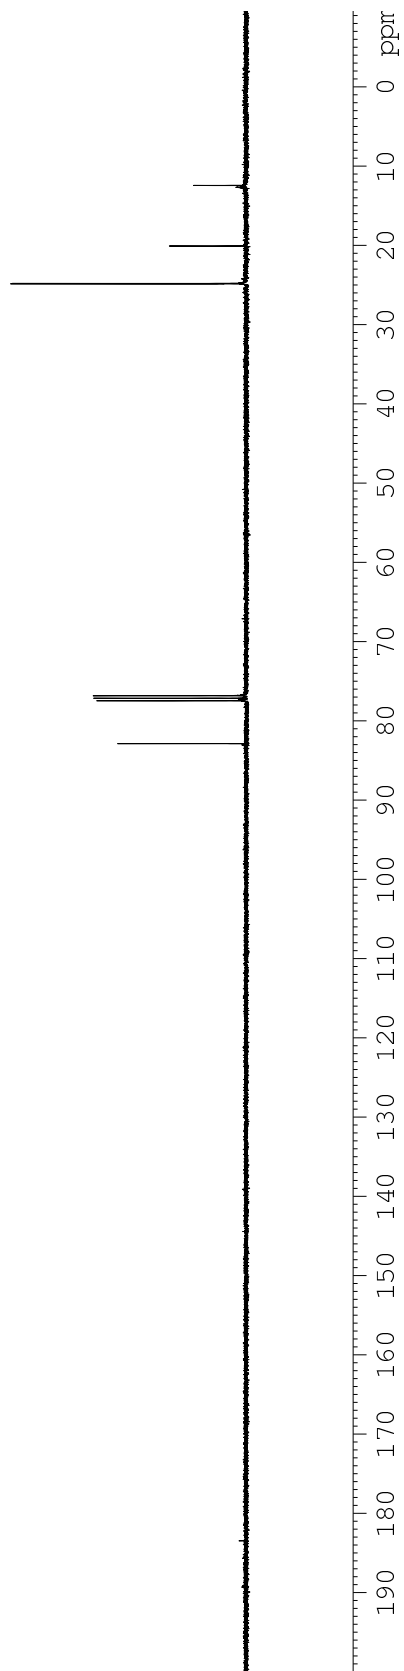

$^1\text{H}$  NMR (400 MHz) of **12b**

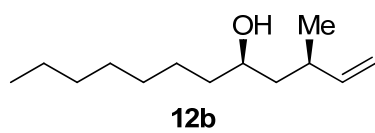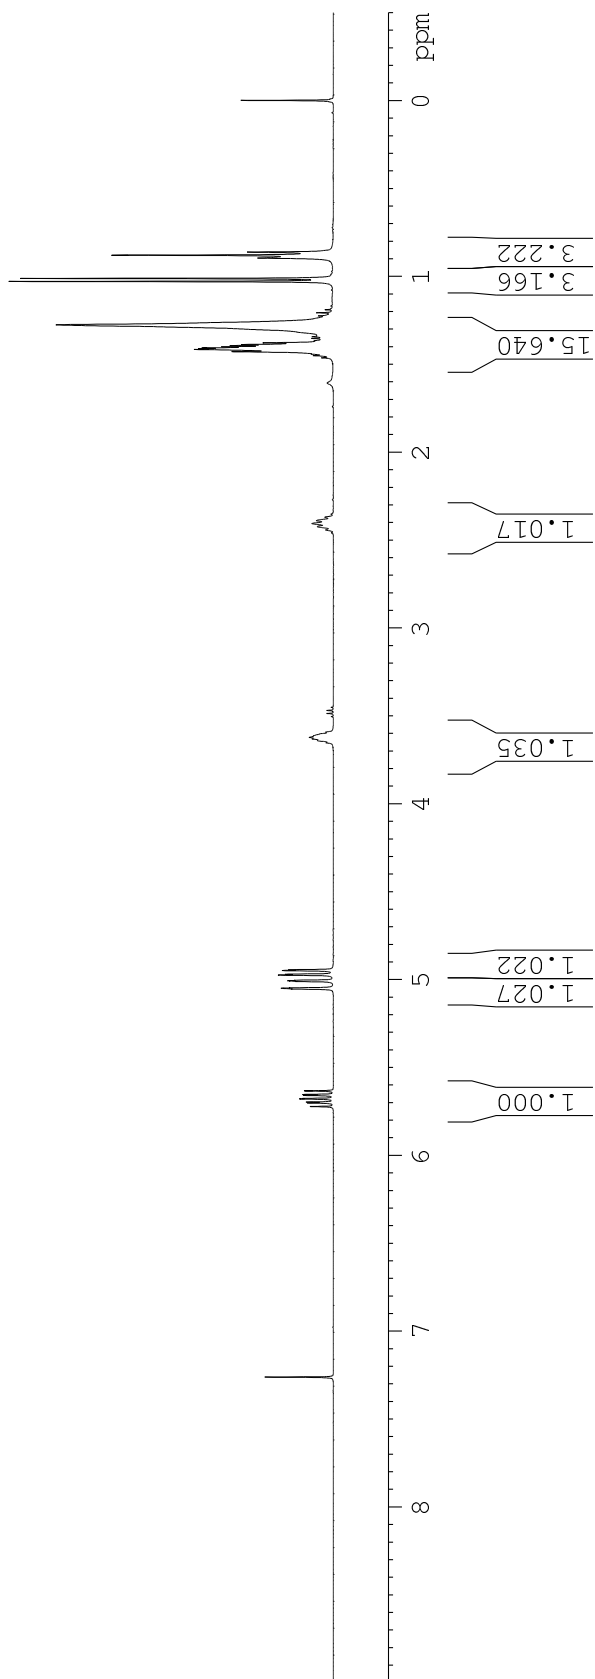

$^{13}\text{C}$  NMR (100 MHz) of **12b**

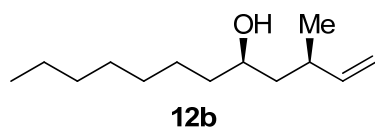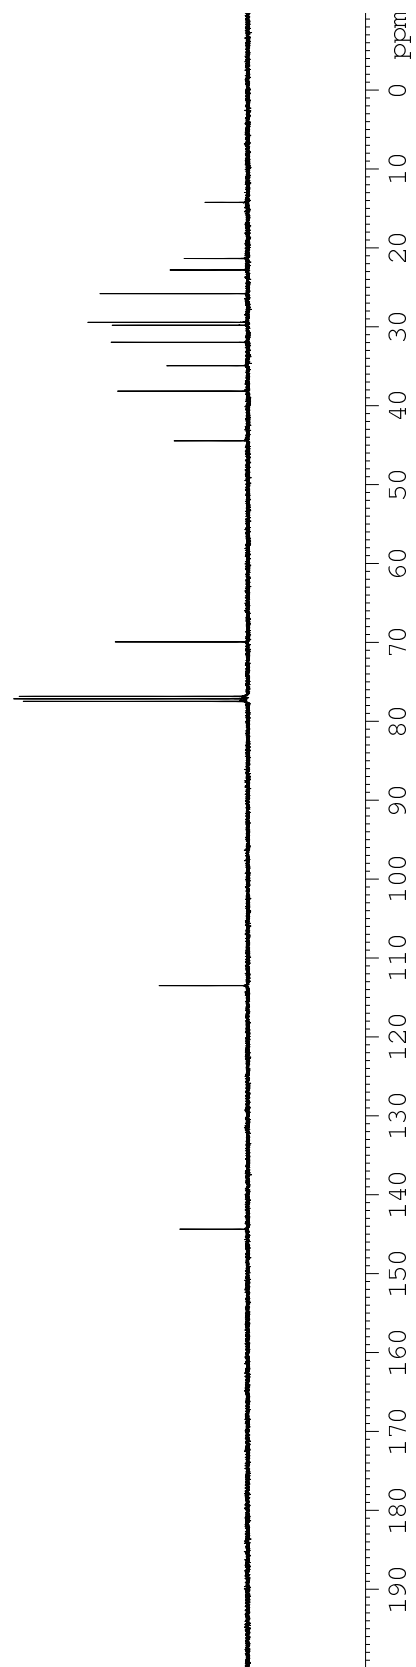

$^1\text{H}$  NMR (400 MHz) of **12c**

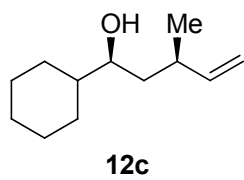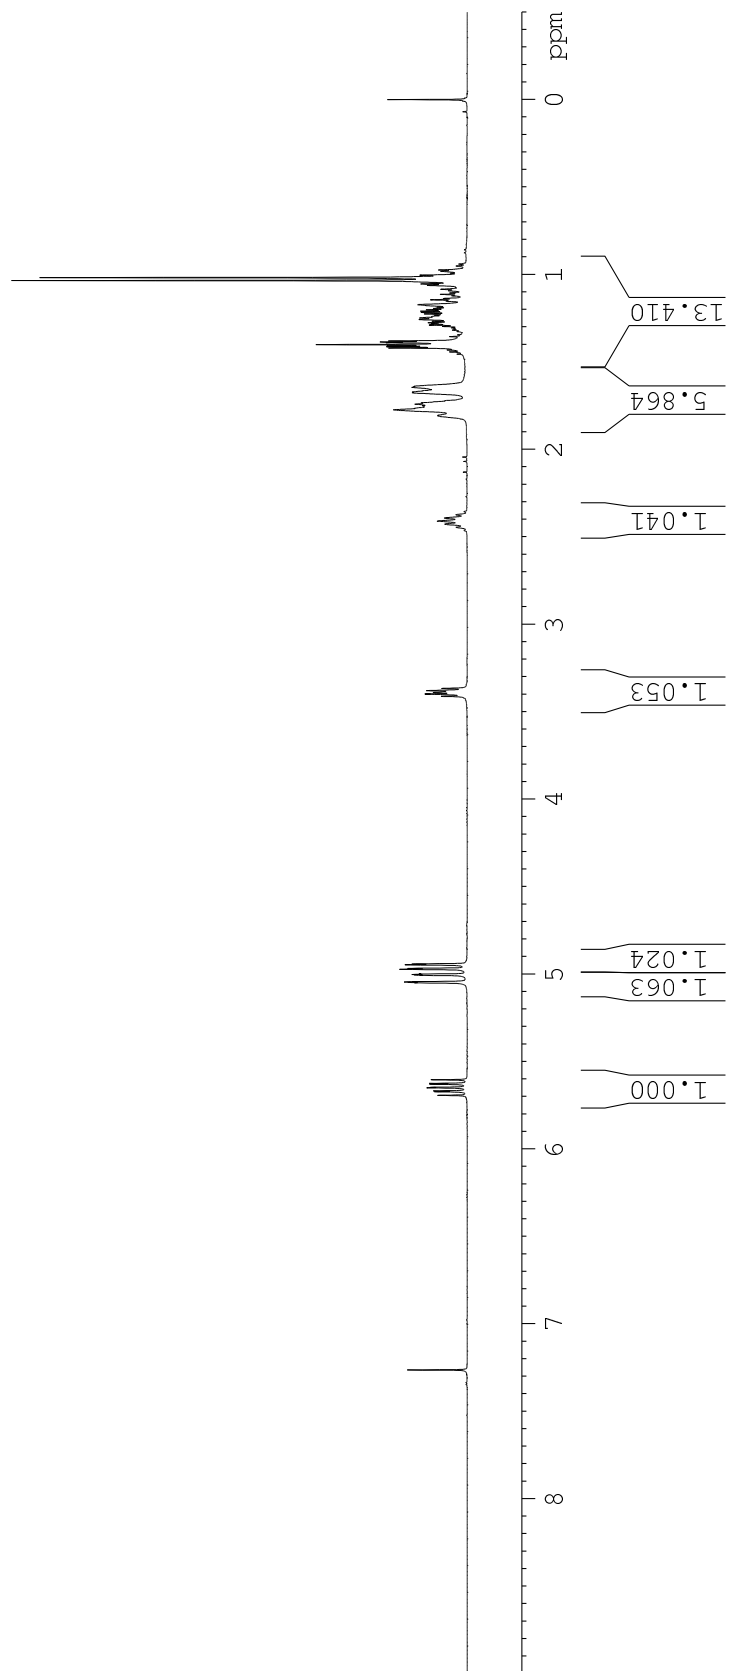

$^{13}\text{C}$  NMR (100 MHz) of **12c**

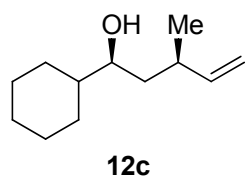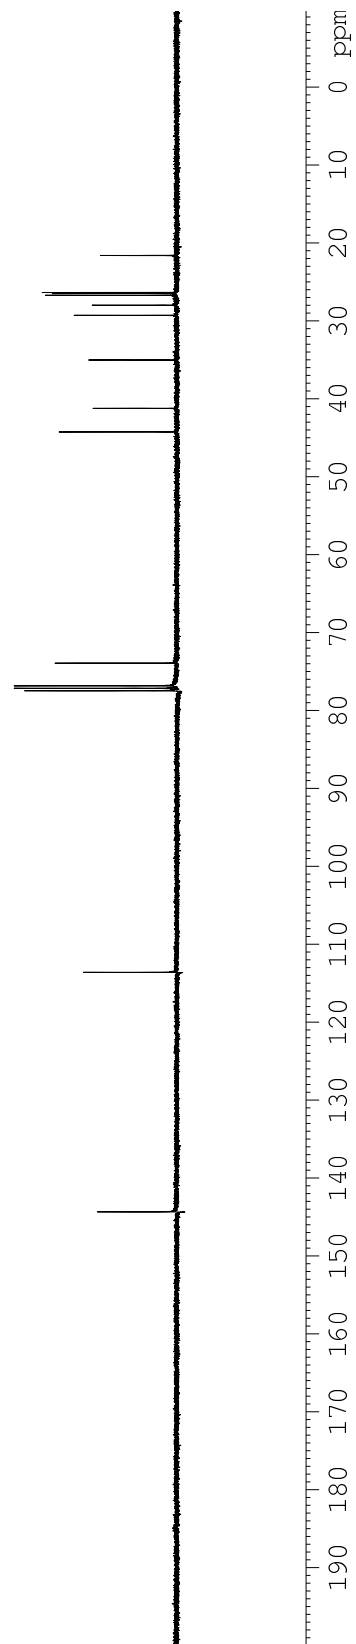

$^1\text{H}$  NMR (400 MHz) of **12d**

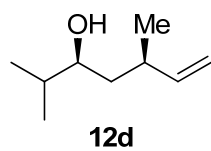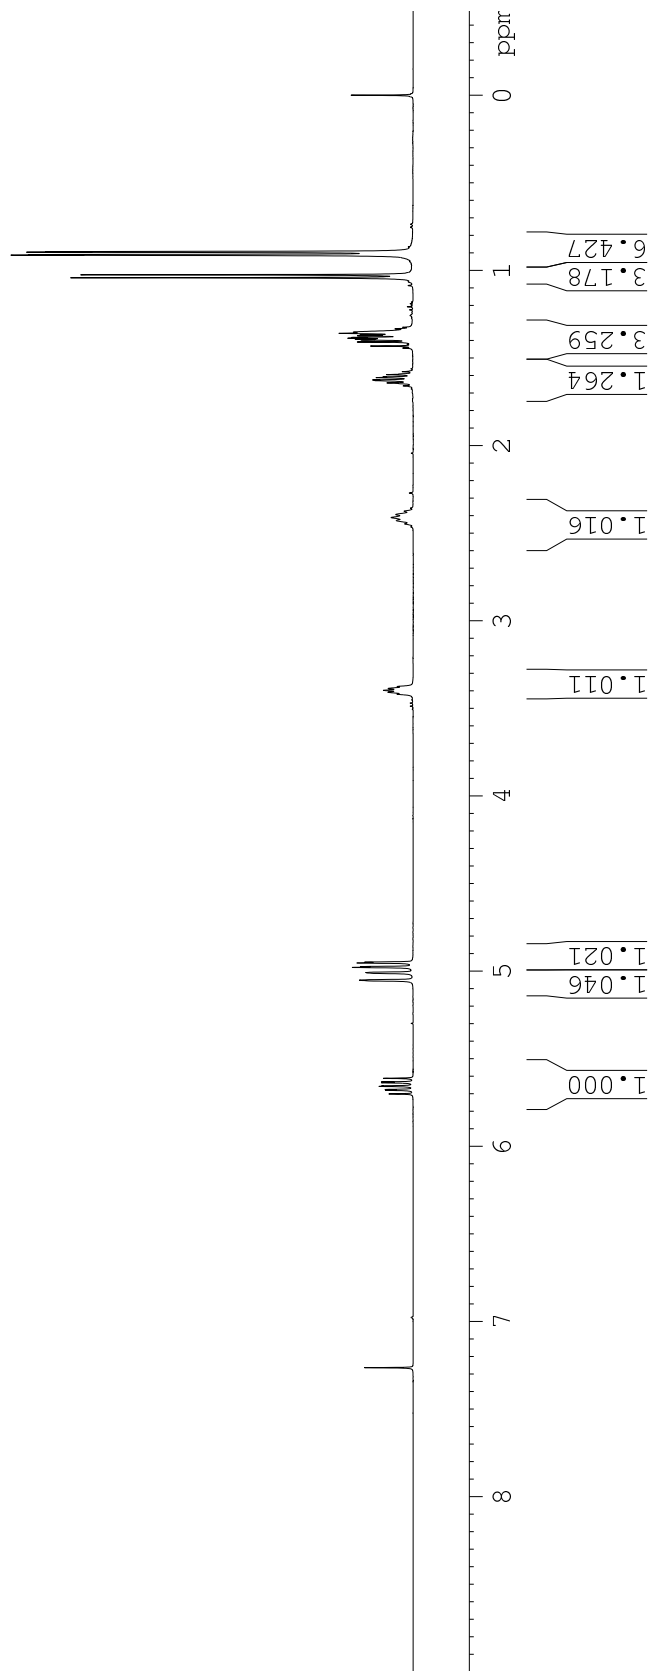

$^{13}\text{C}$  NMR (100 MHz) of **12d**

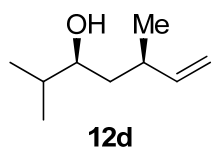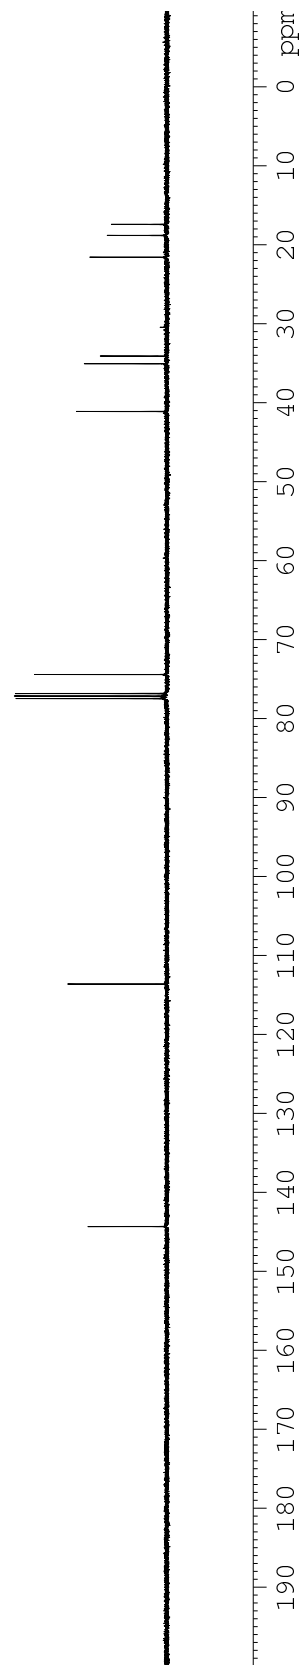

$^1\text{H}$  NMR (400 MHz) of **12e**

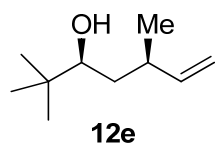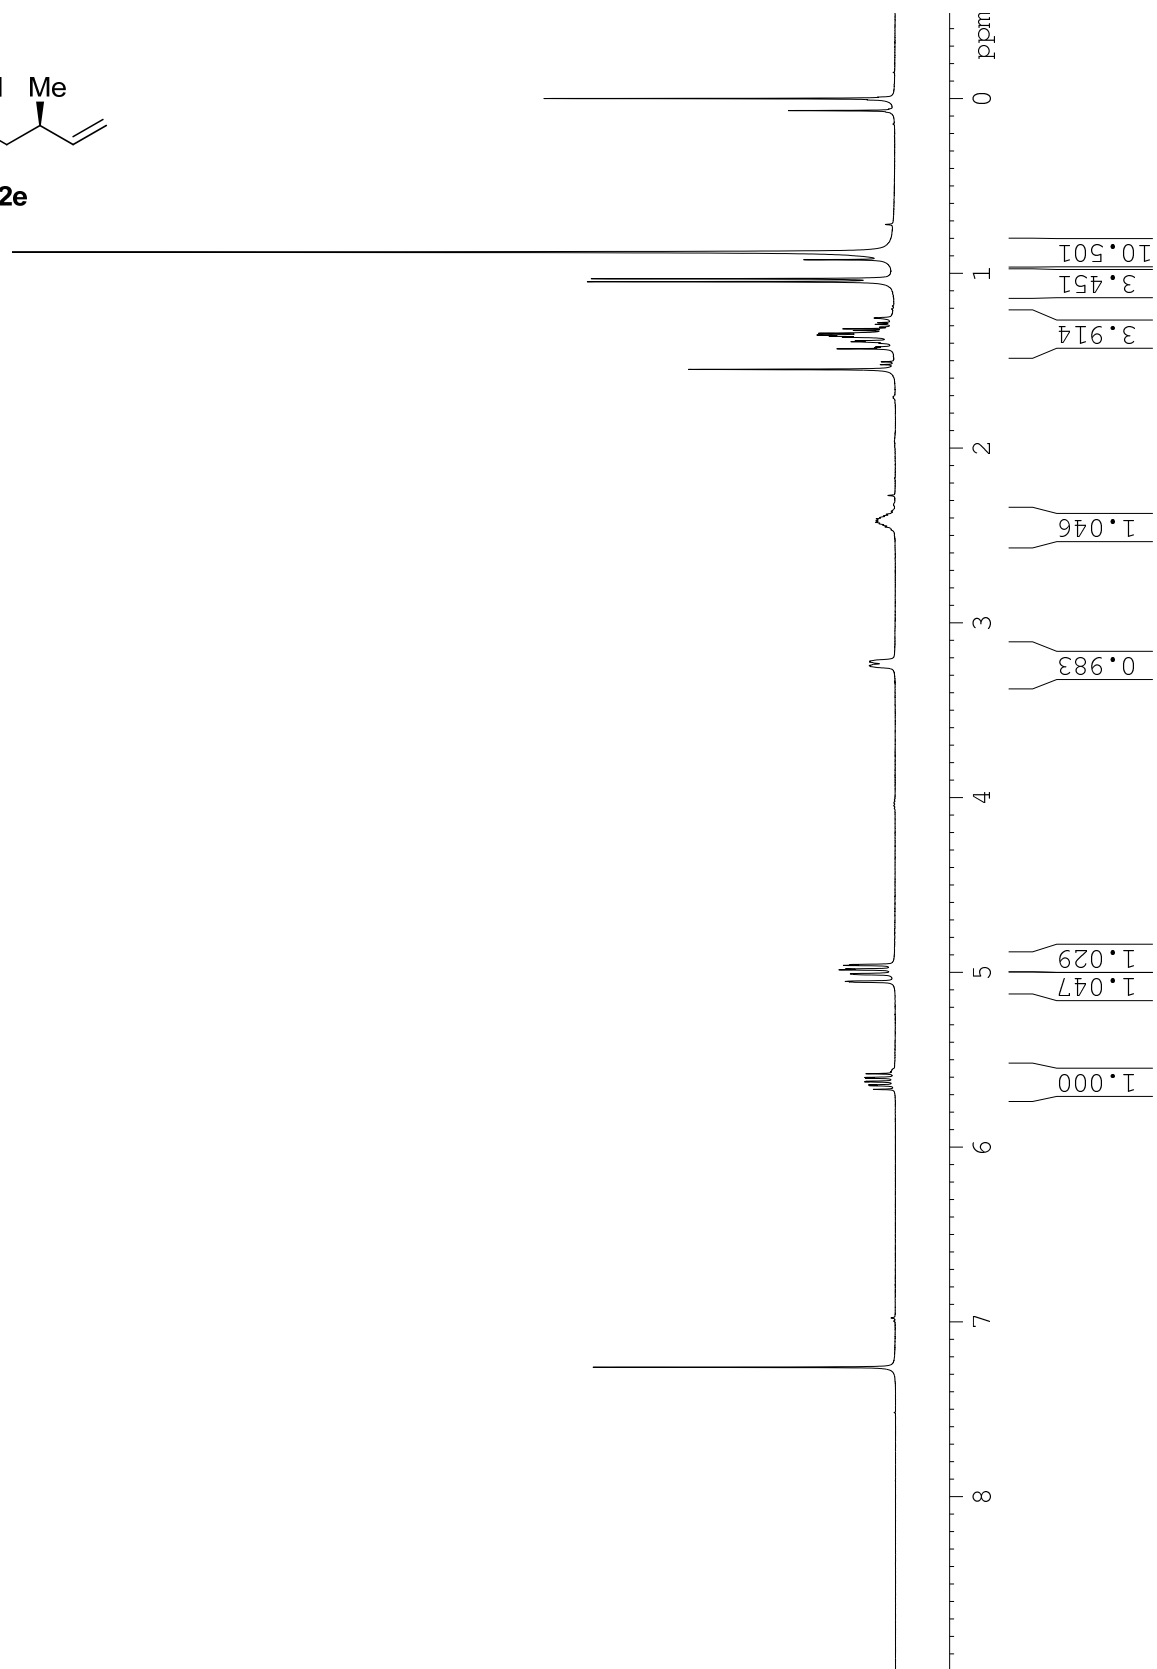



$^{13}\text{C}$  NMR (100 MHz) of **12e**

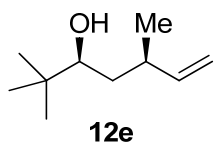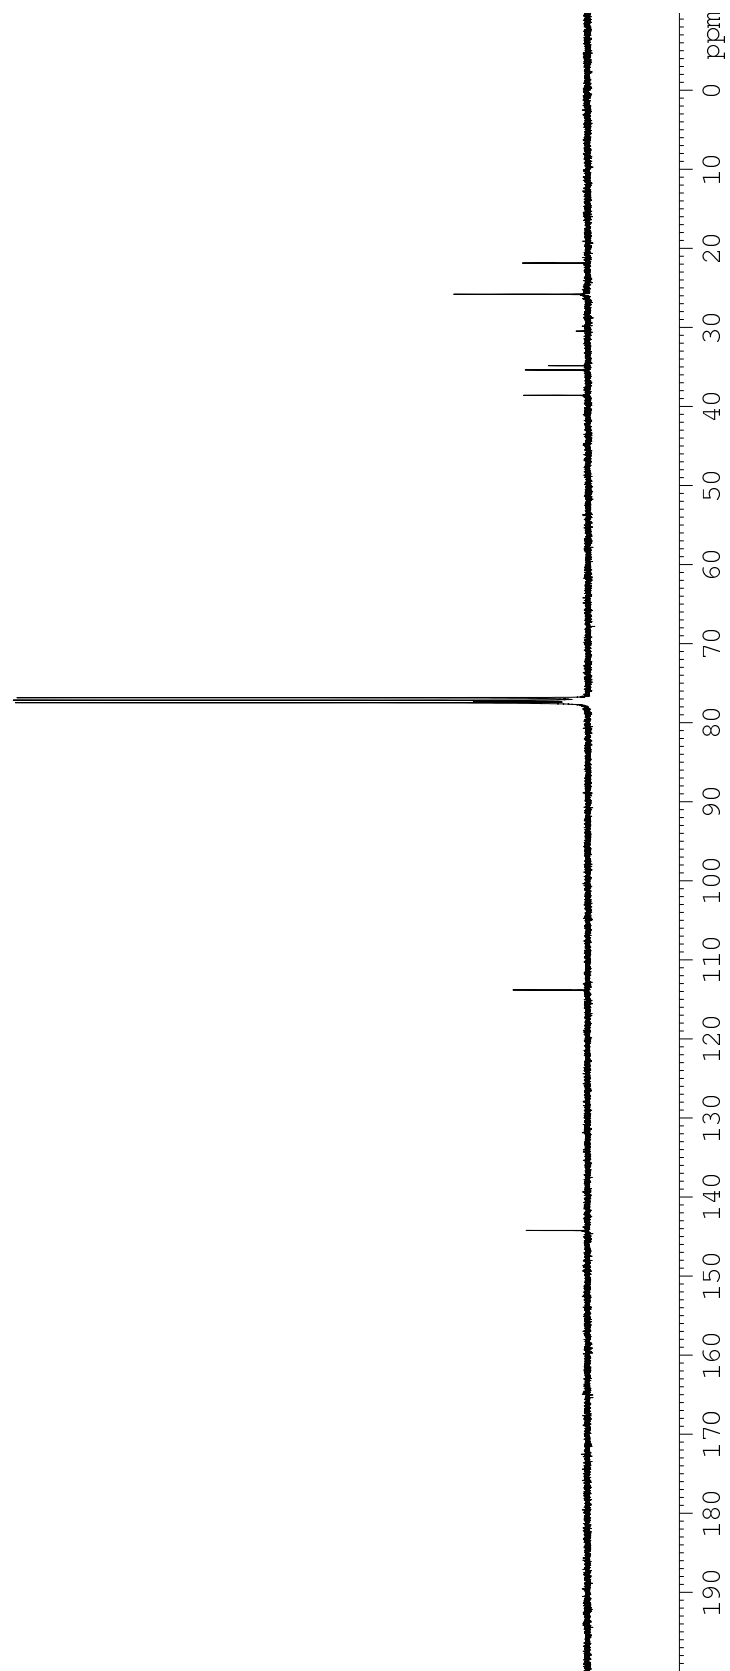

$^1\text{H}$  NMR (400 MHz) of **12f**

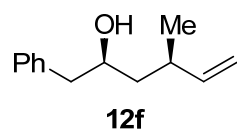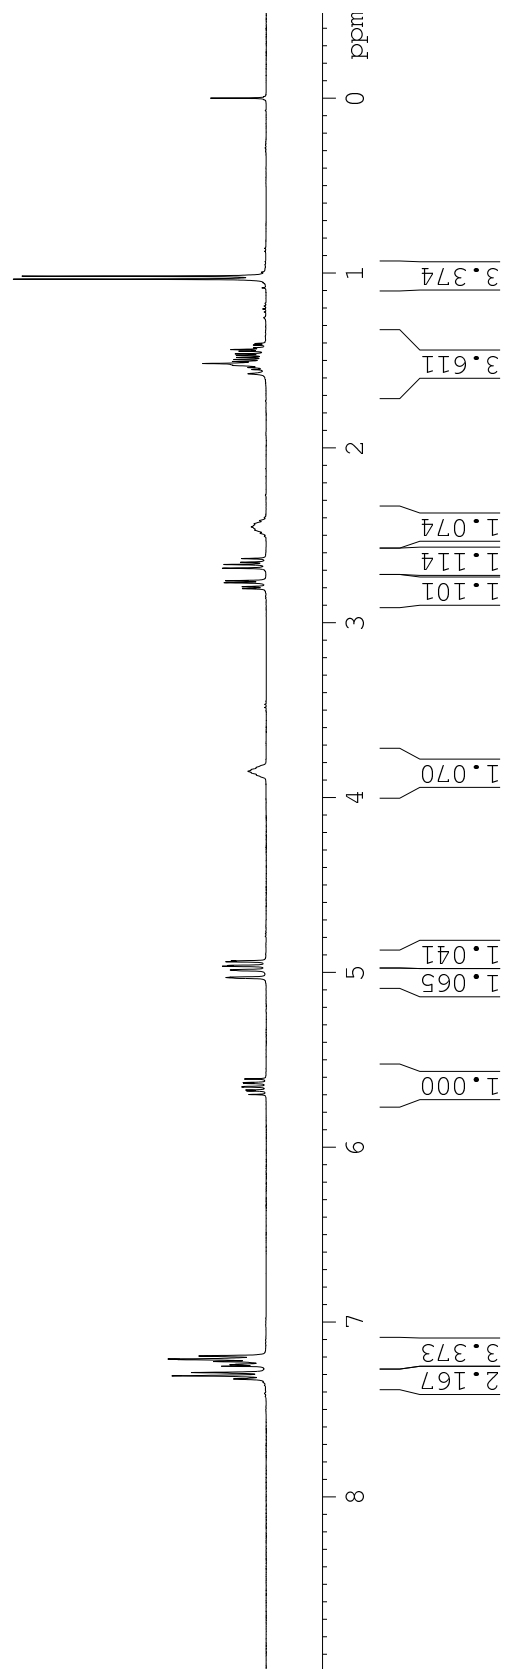

$^{13}\text{C}$  NMR (100 MHz) of **12f**

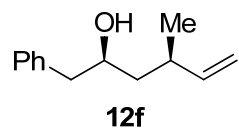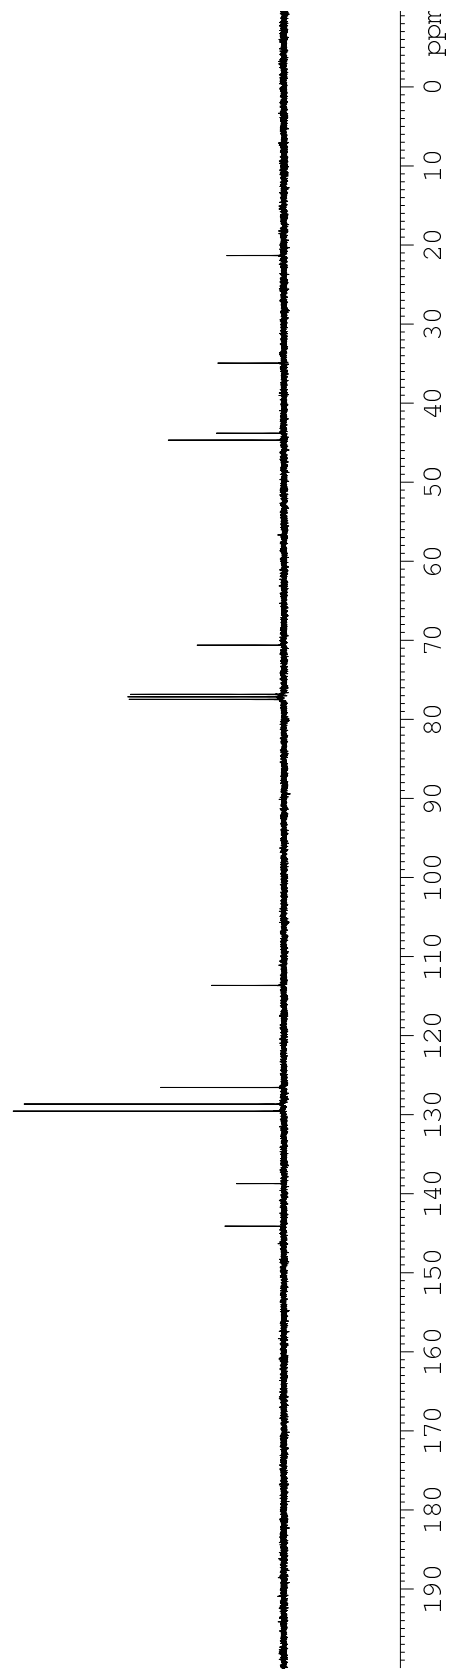

$^1\text{H}$  NMR (400 MHz) of **12g**

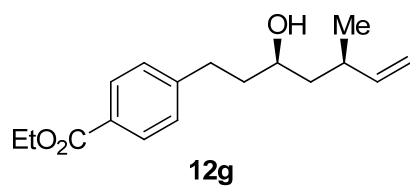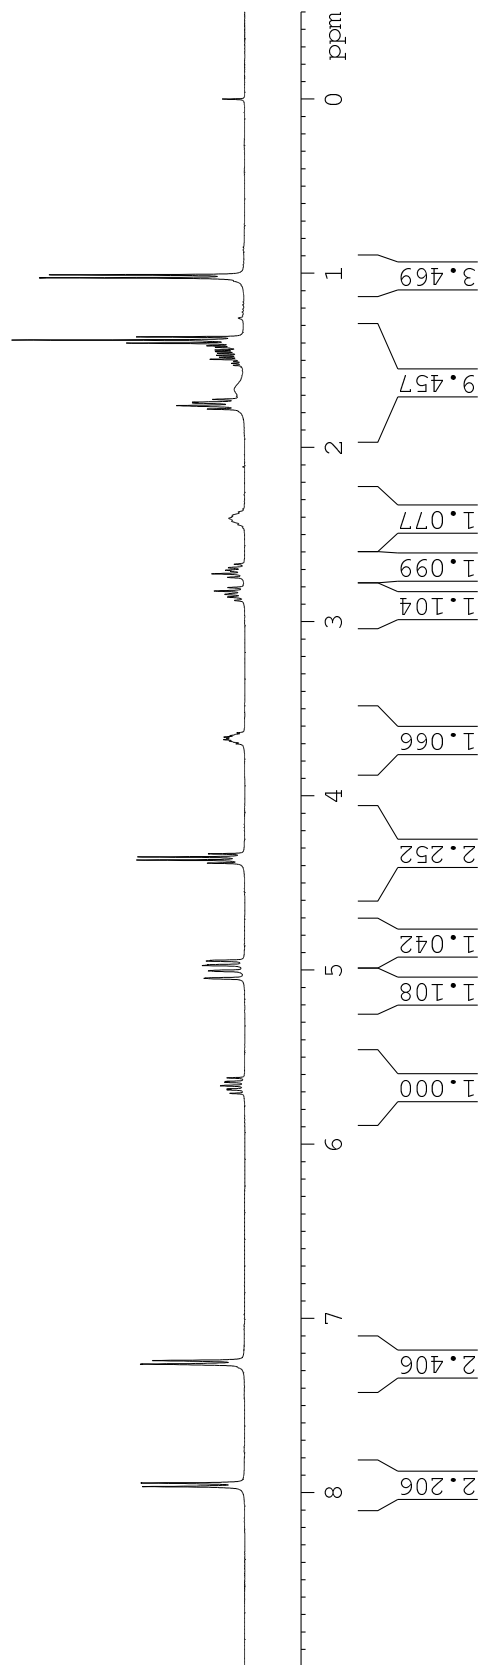

$^{13}\text{C}$  NMR (100 MHz) of **12g**

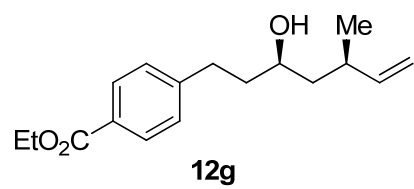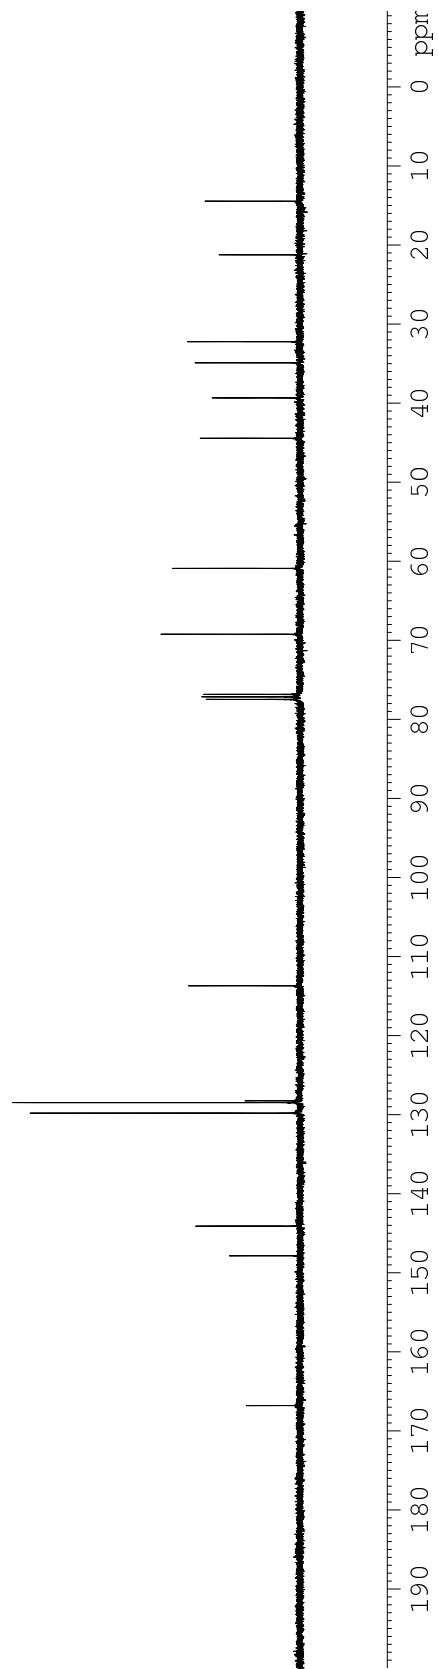

$^1\text{H}$  NMR (400 MHz) of **12h**

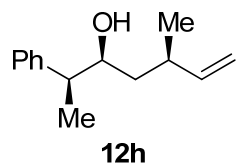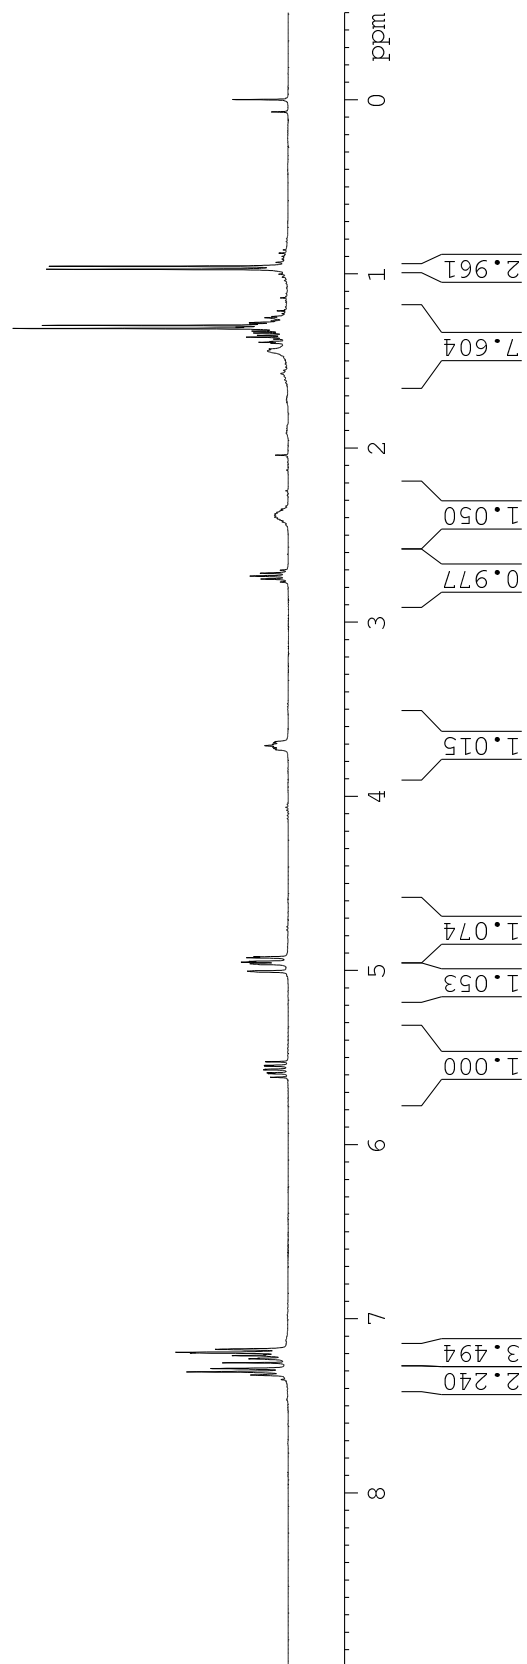

$^{13}\text{C}$  NMR (100 MHz) of **12h**

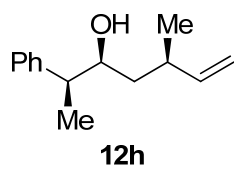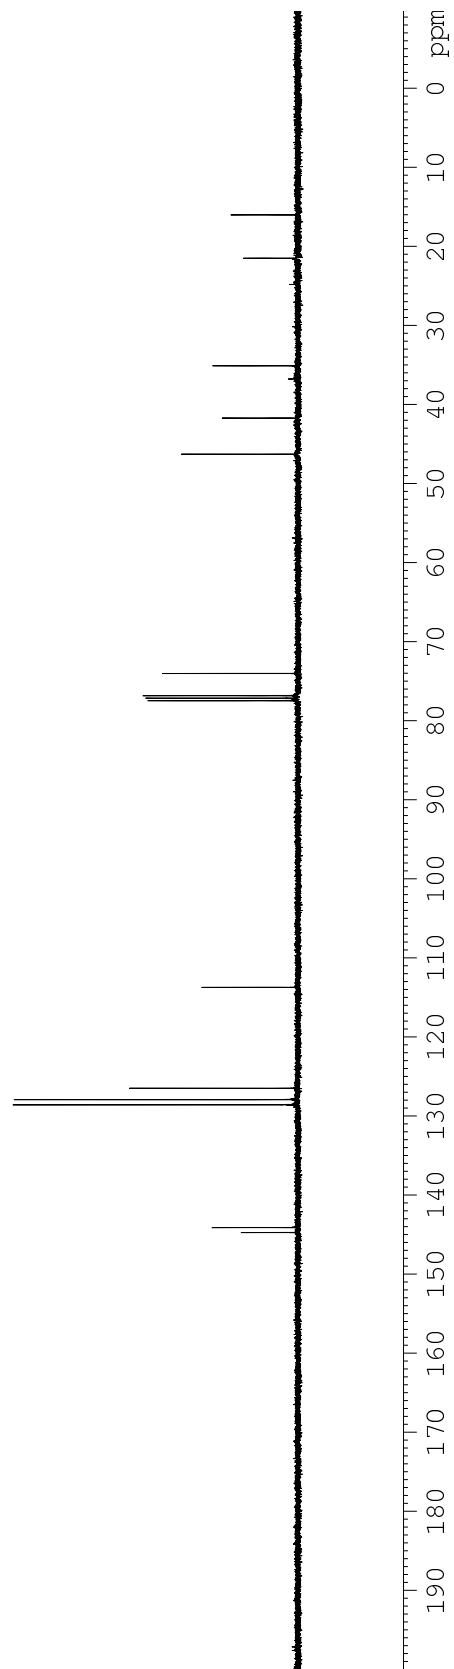

$^1\text{H}$  NMR (400 MHz) of **12h'**

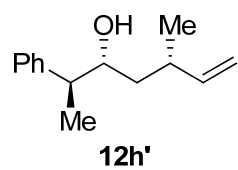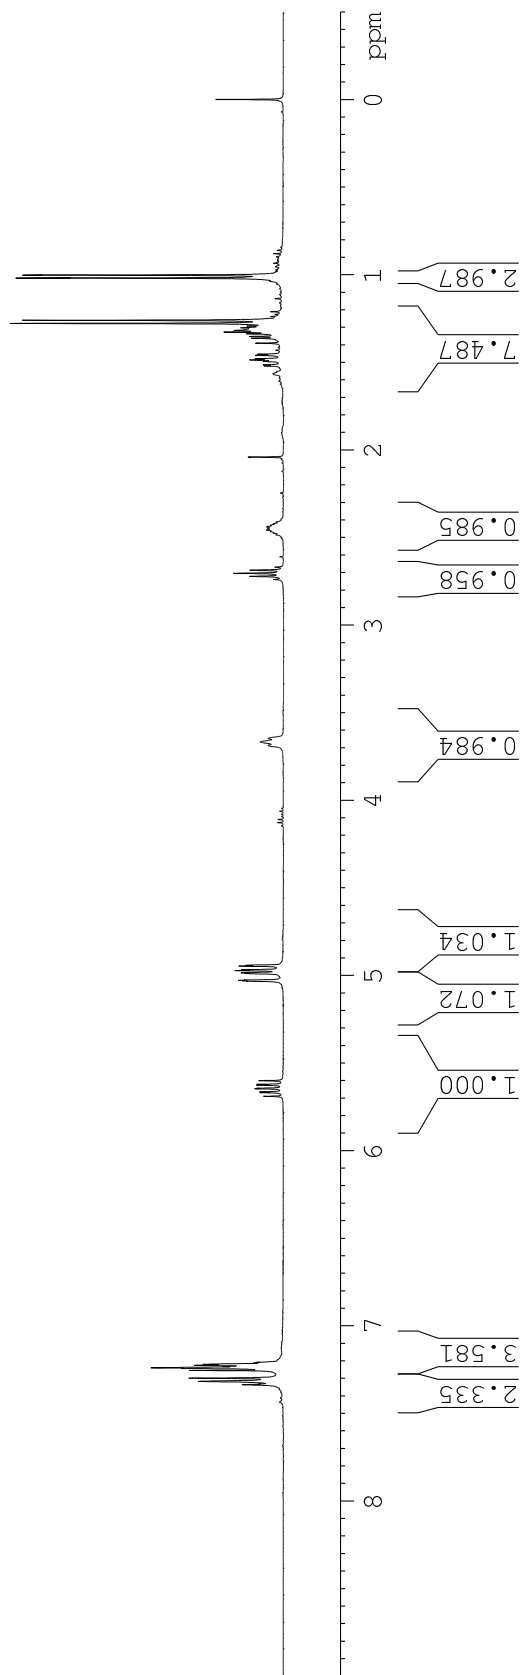



$^{13}\text{C}$  NMR (100 MHz) of **12h'**

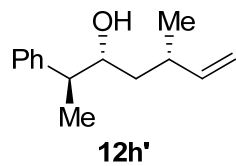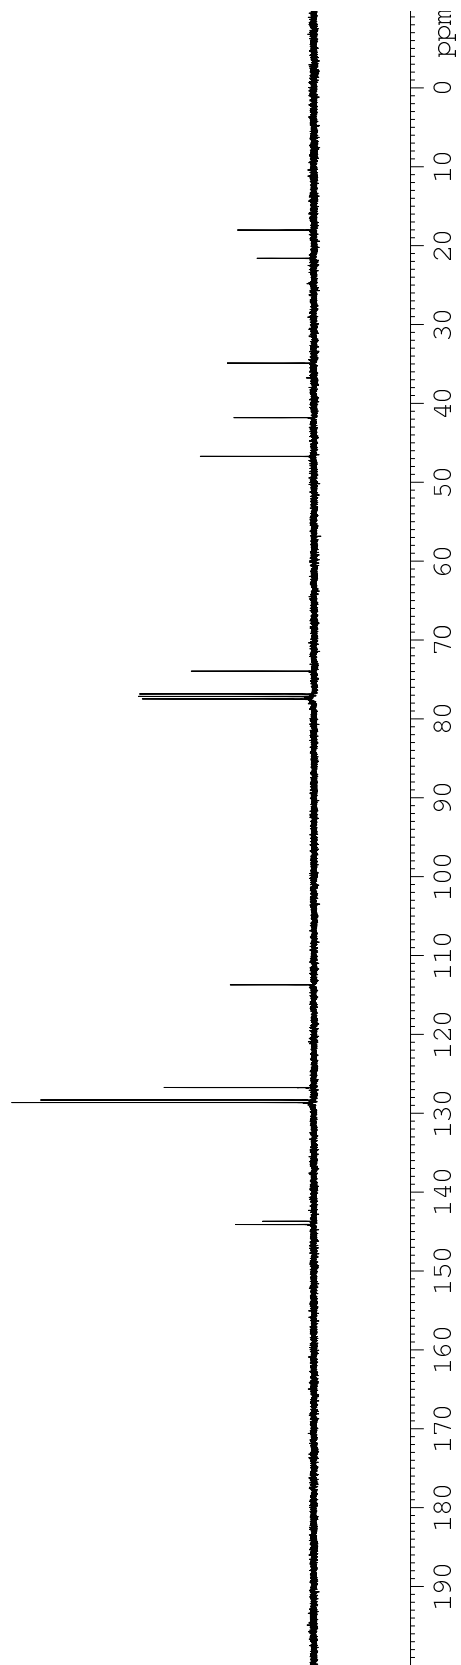

$^1\text{H}$  NMR (400 MHz) of **12i**

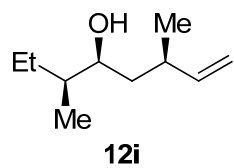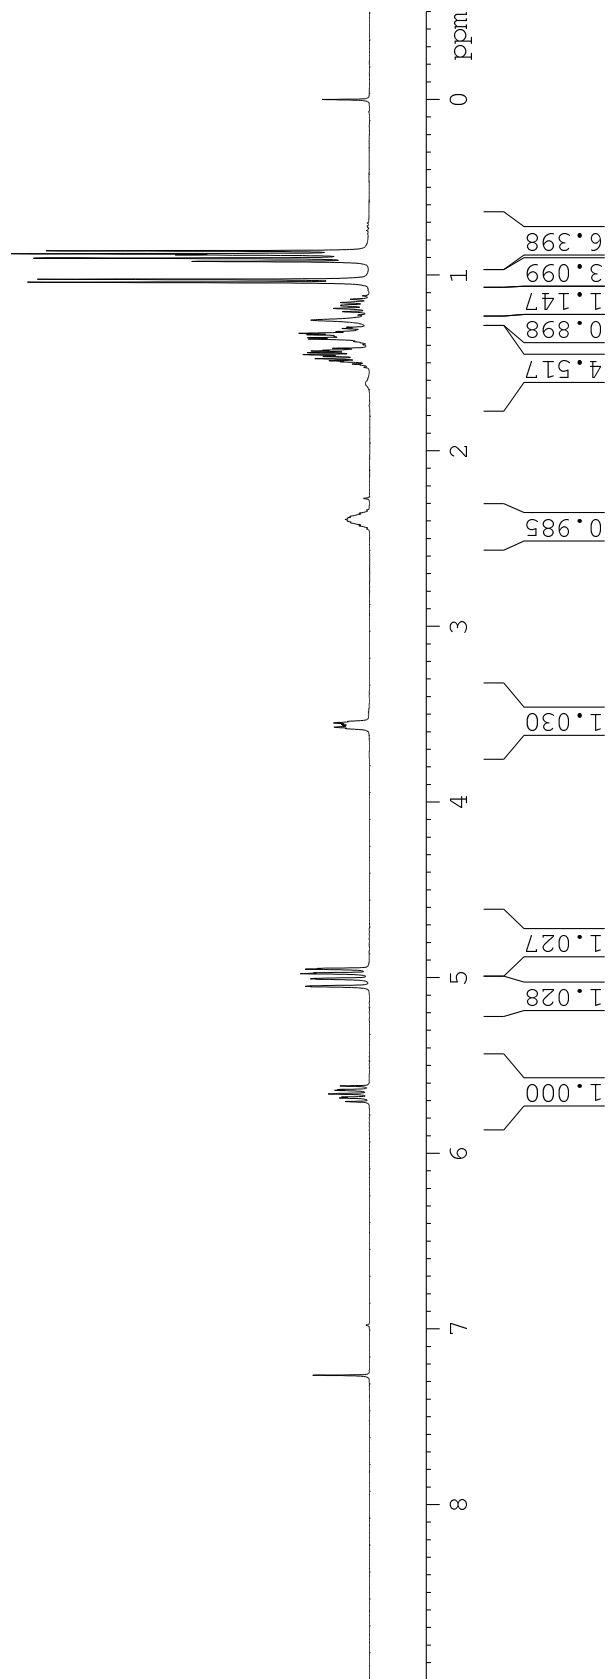

$^{13}\text{C}$  NMR (100 MHz) of **12i**

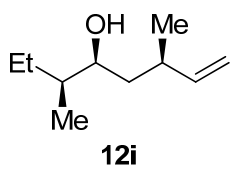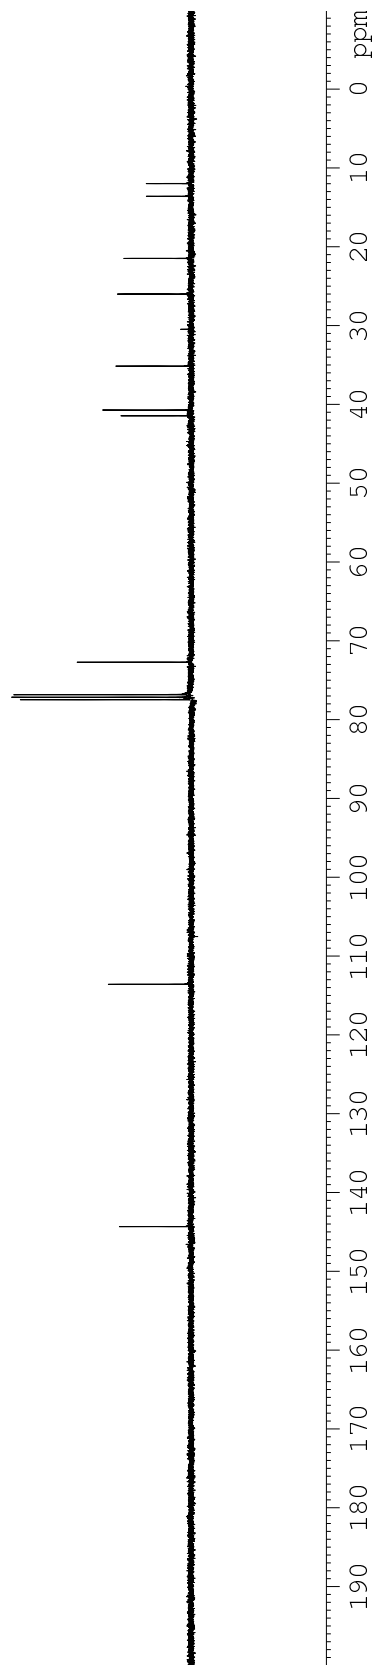

$^1\text{H}$  NMR (400 MHz) of **12i'**

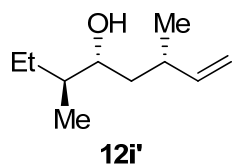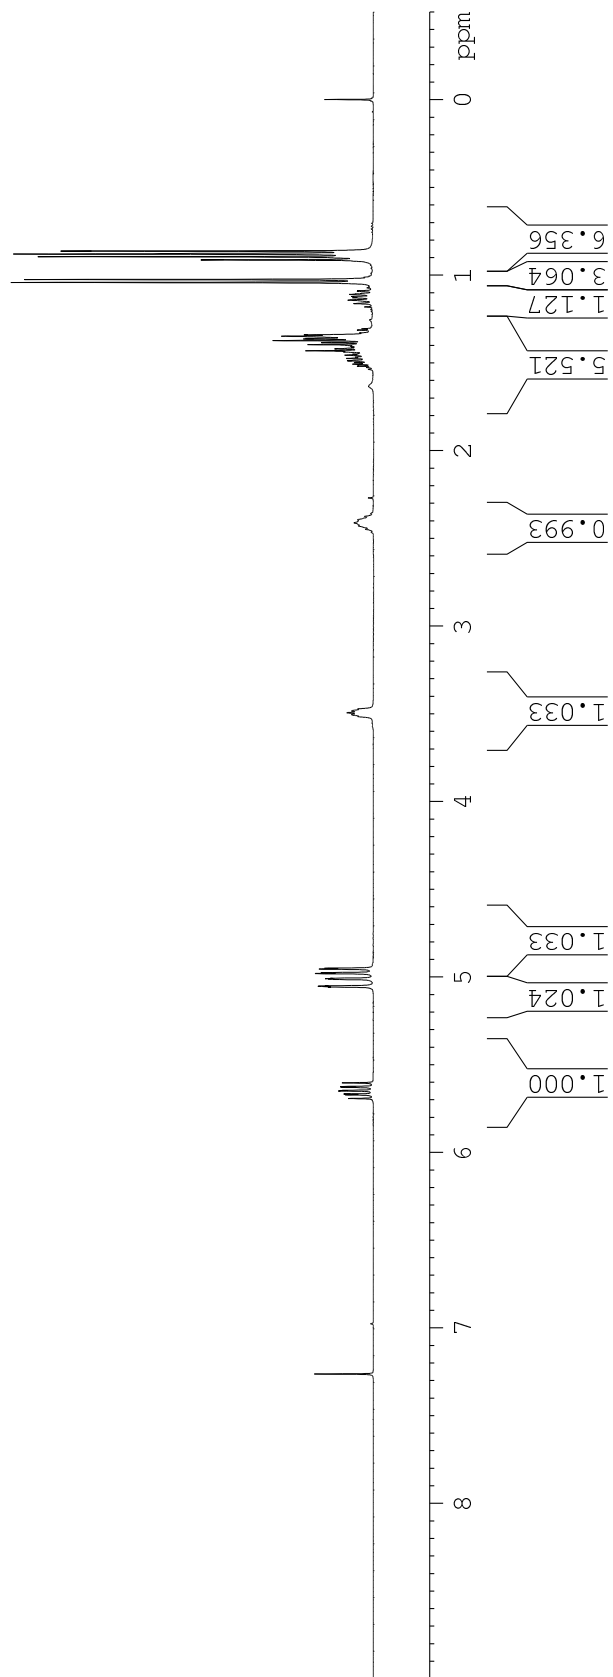

$^{13}\text{C}$  NMR (100 MHz) of **12i'**

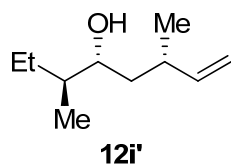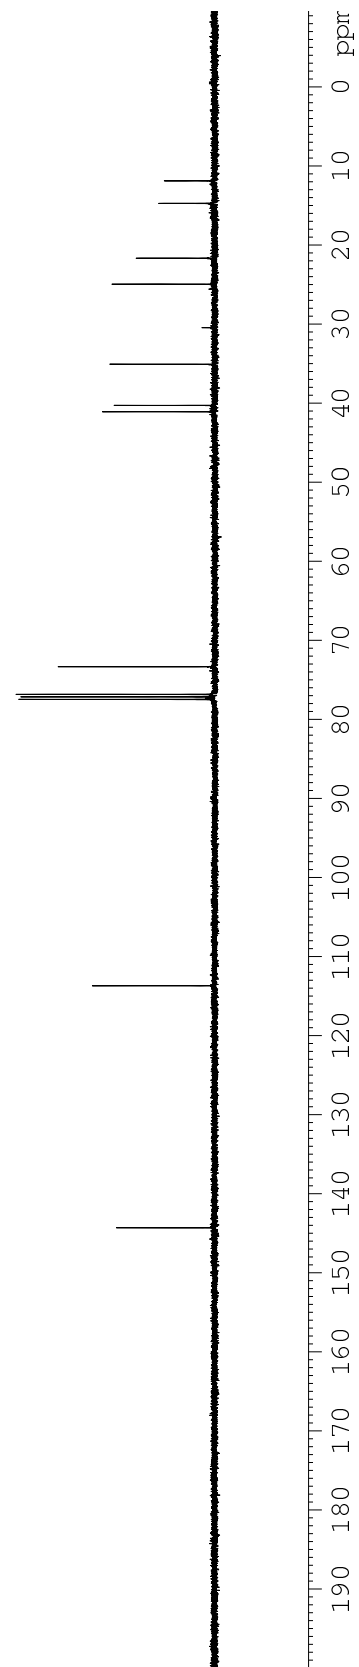

# HPLC chromatograms

## S4 and *ent*-S4

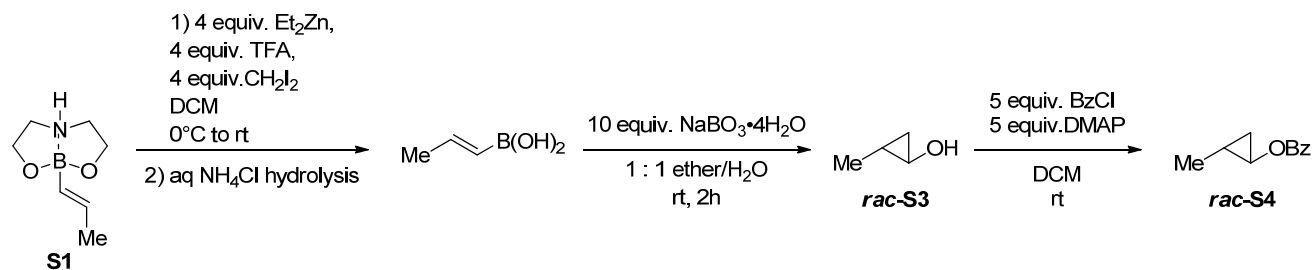

Racemic S4 was prepared from S1 by cyclopropanation, oxidation and benzylation.

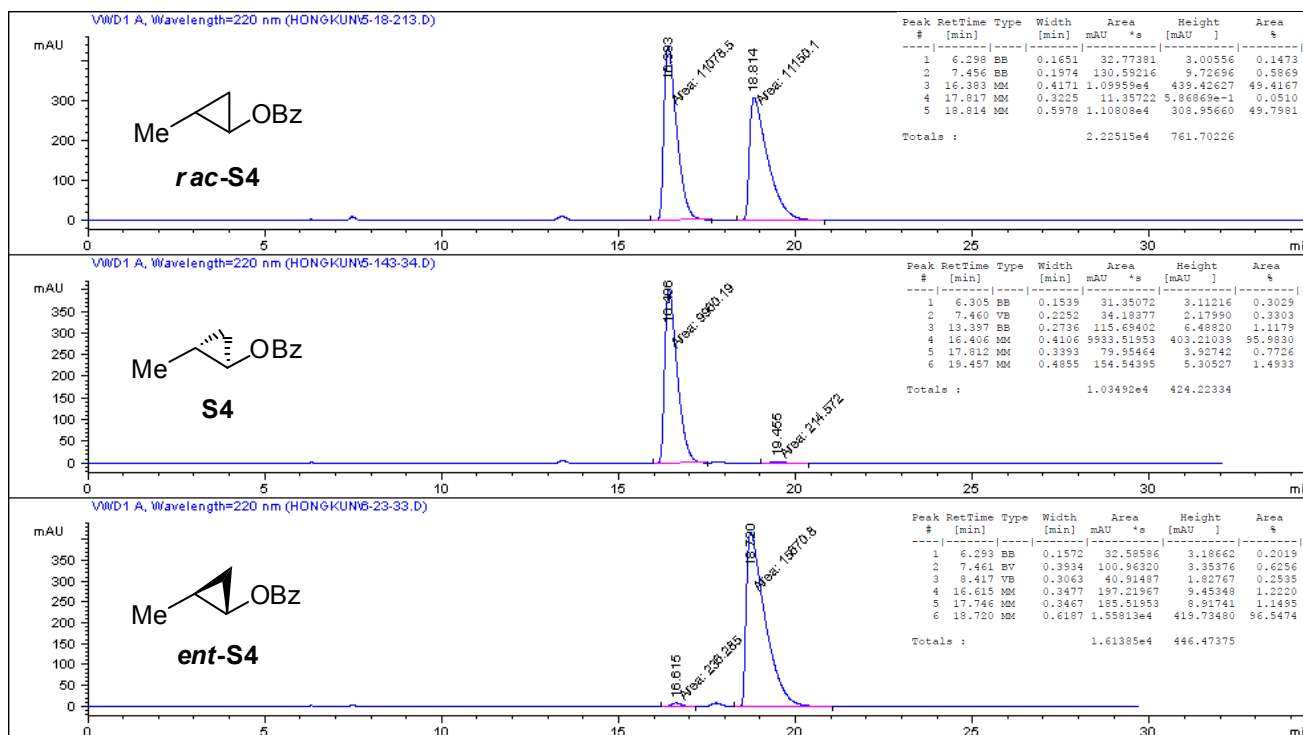

All racemic homocrotylation compounds were prepared from our racemic **1**, containing 5 % *cis*-cyclopropane, resulting in a shoulder peak in all racemic HPLC chromatograms.

## 12a

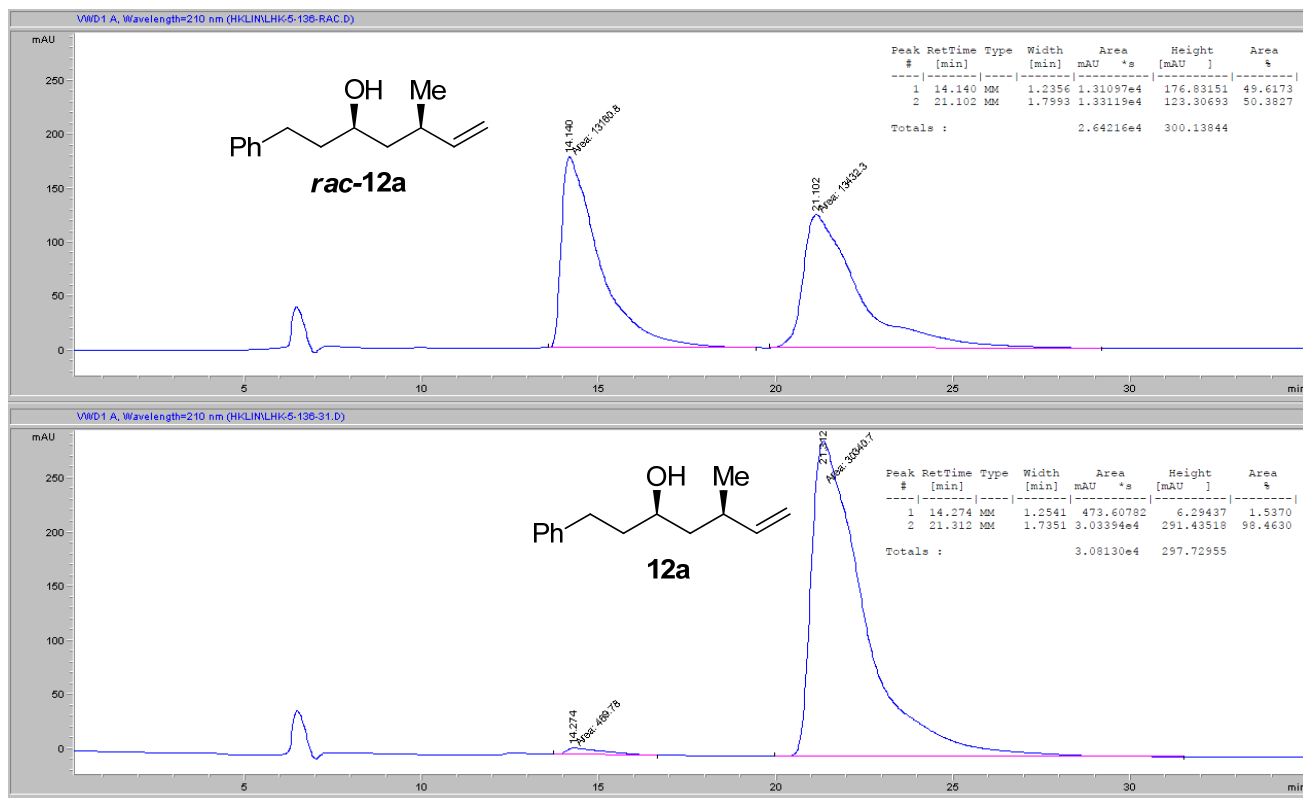

12b

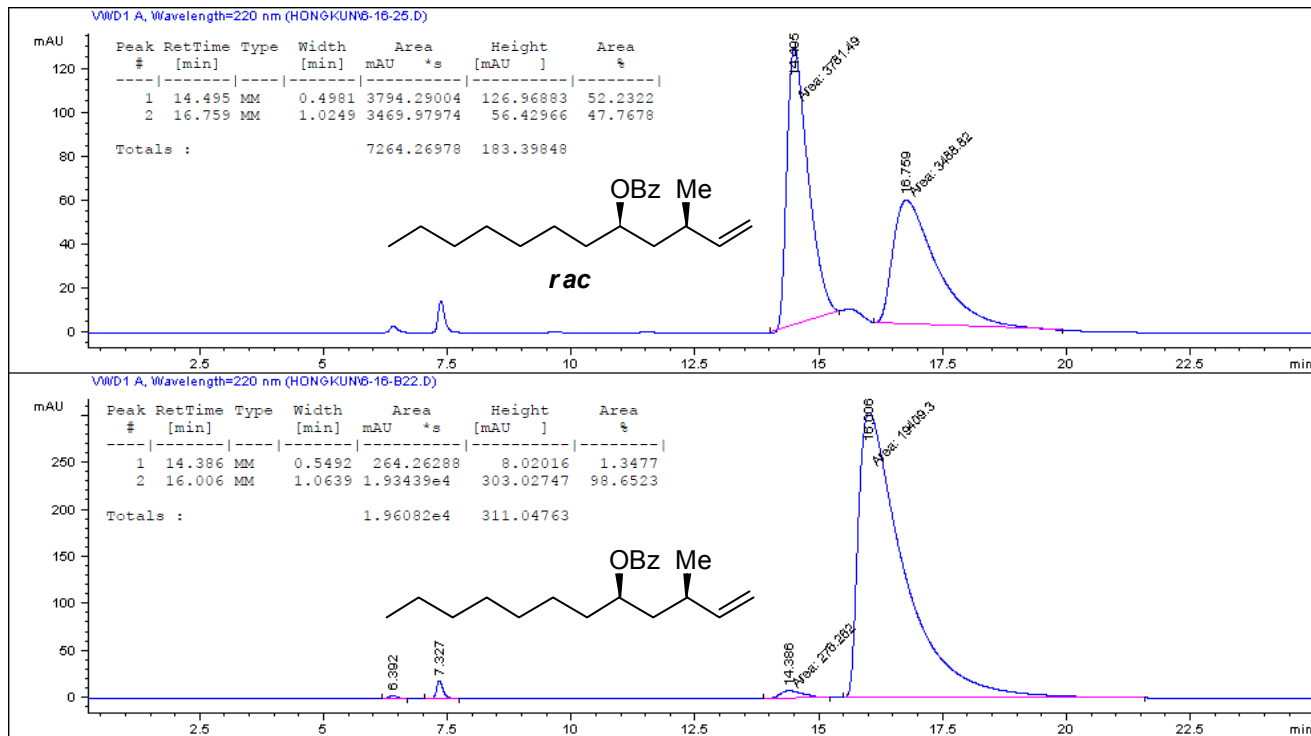

12c

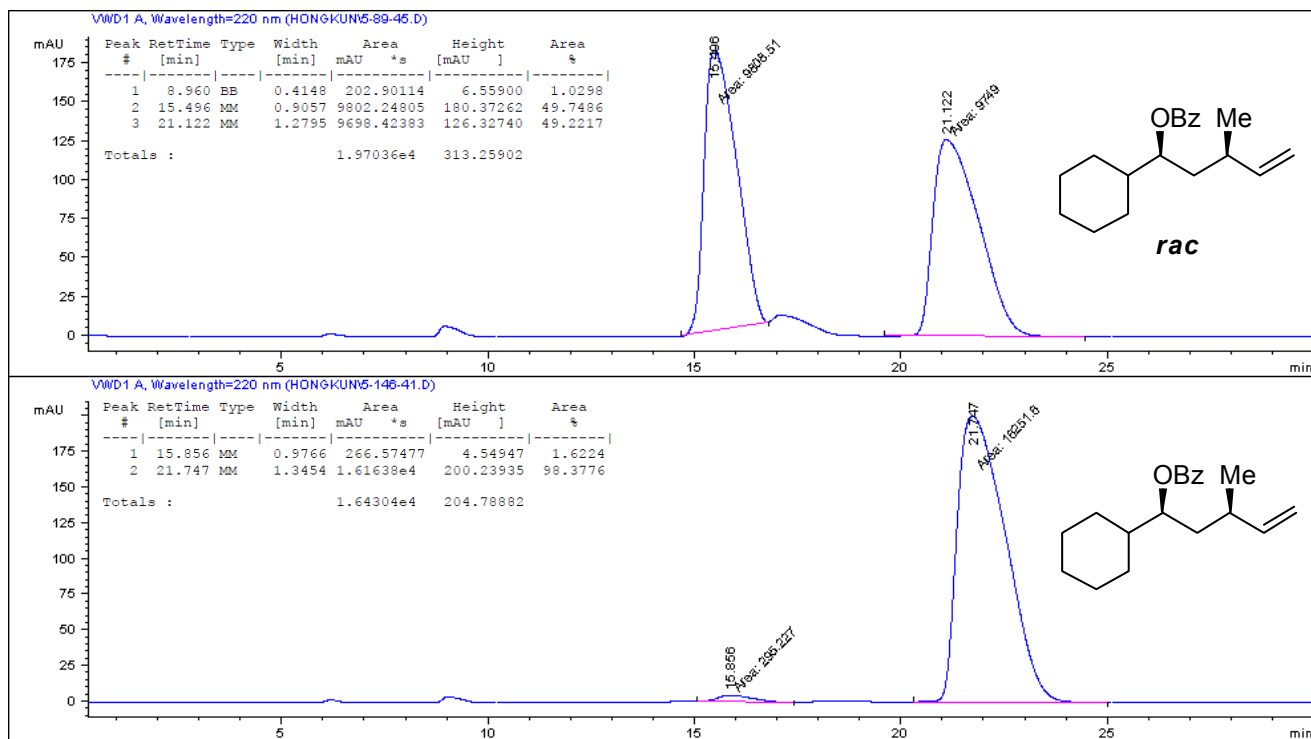



12d

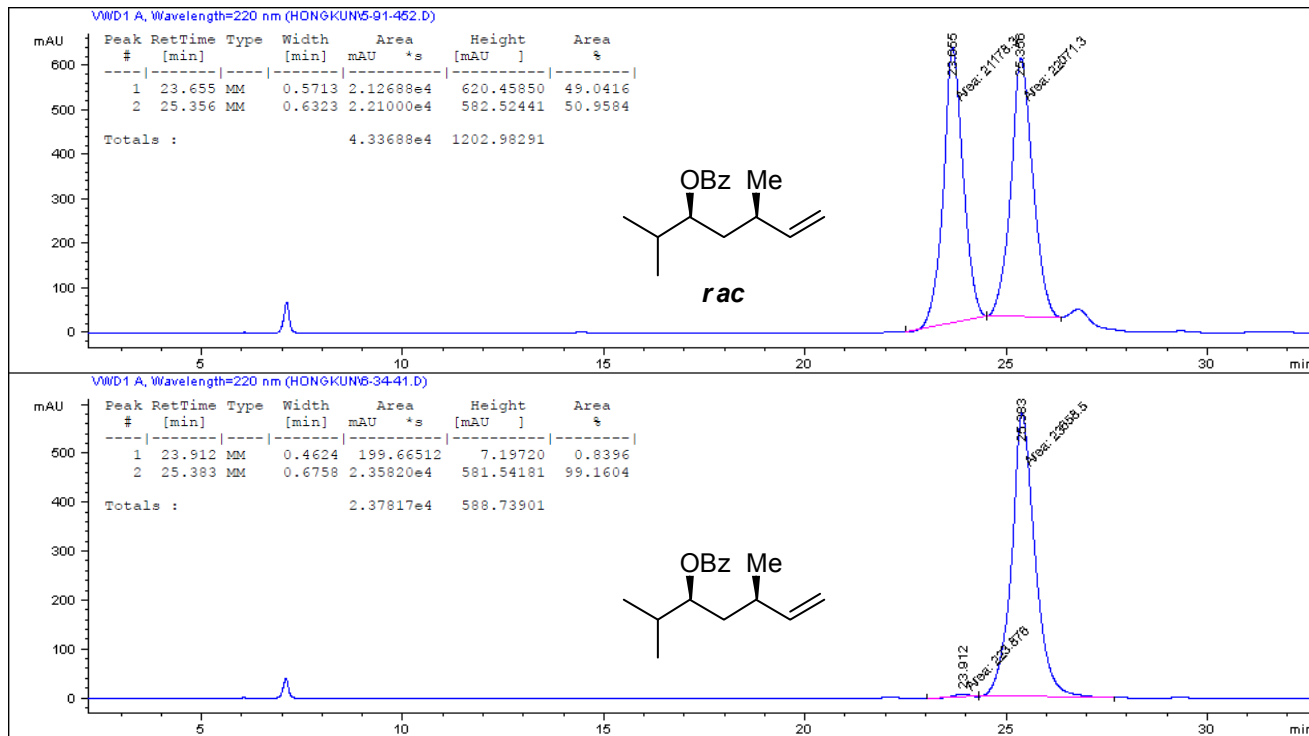

12e

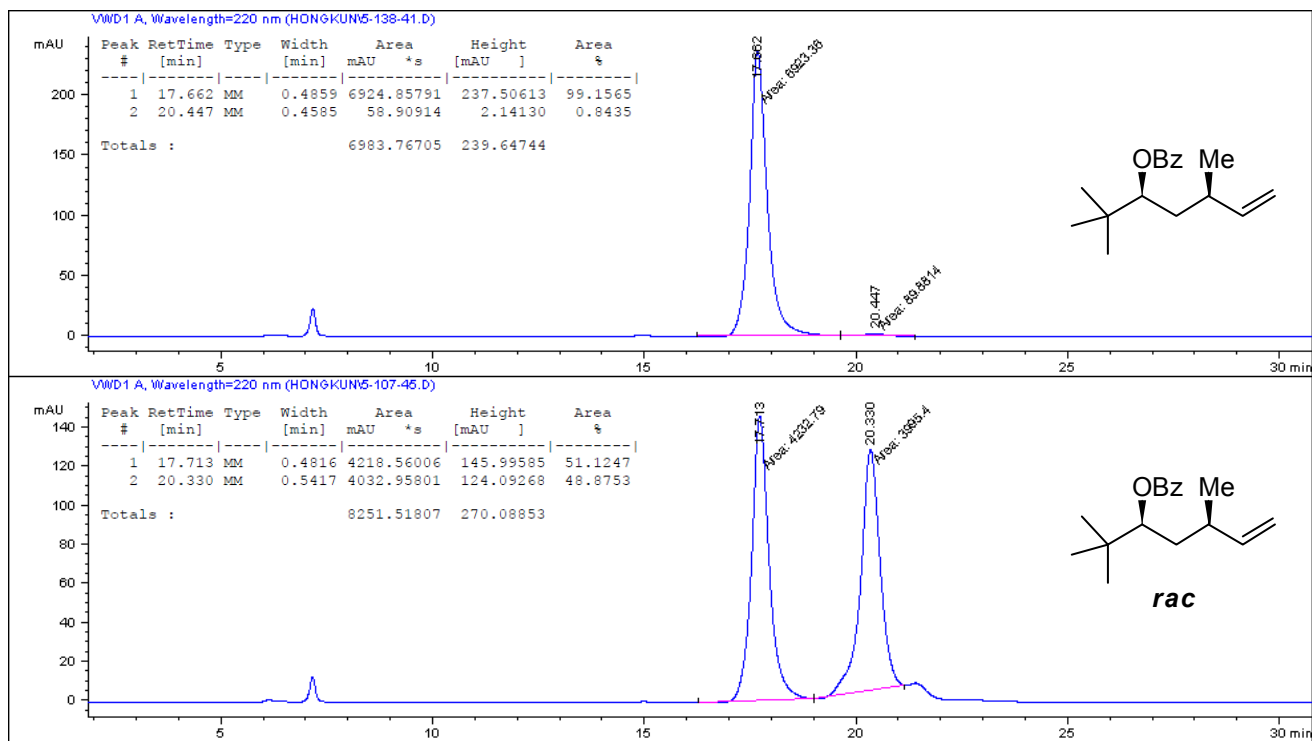

12f

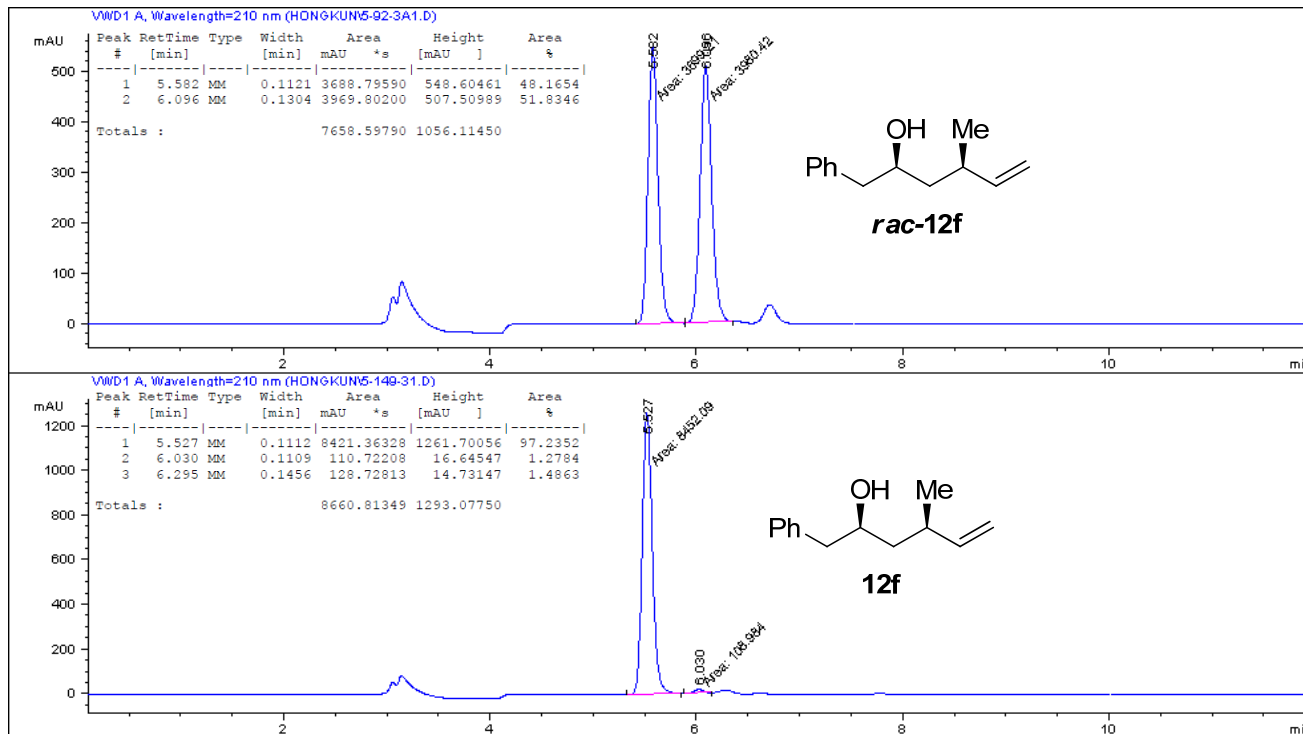

12g

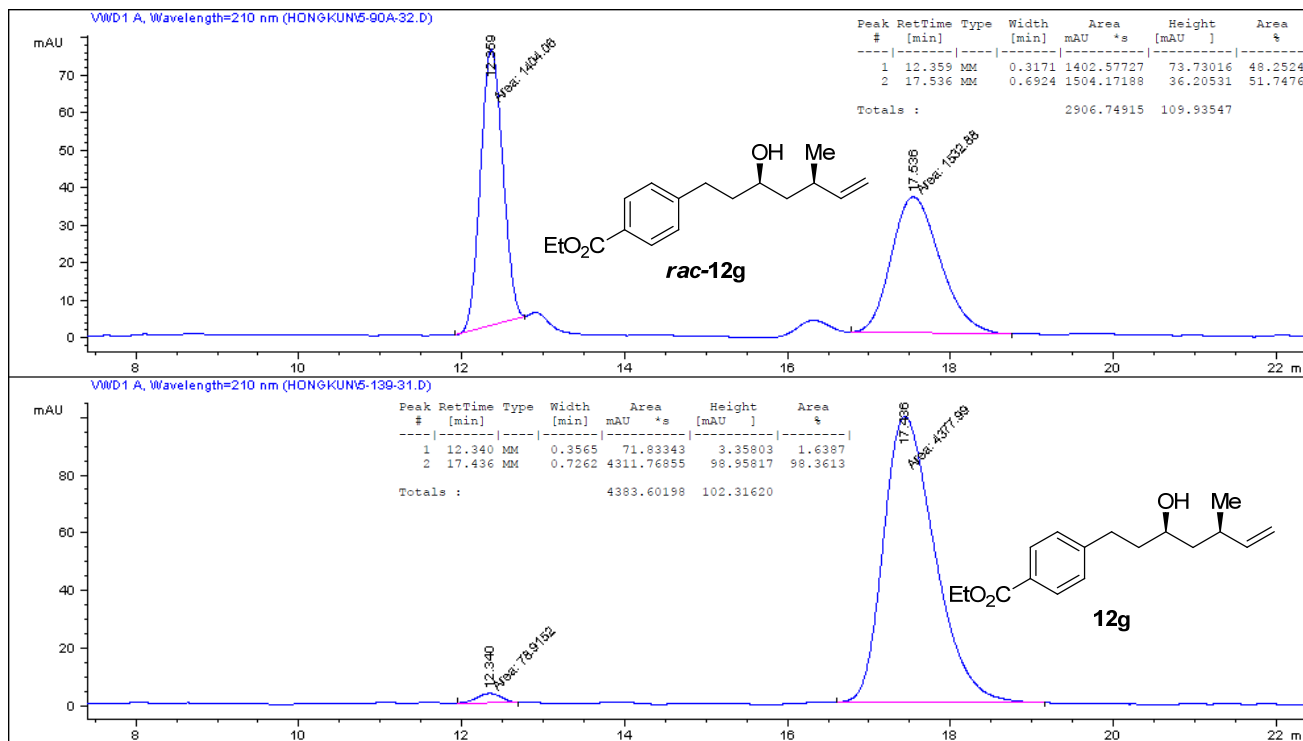

# LC-MS chromatogram of 12h/h'

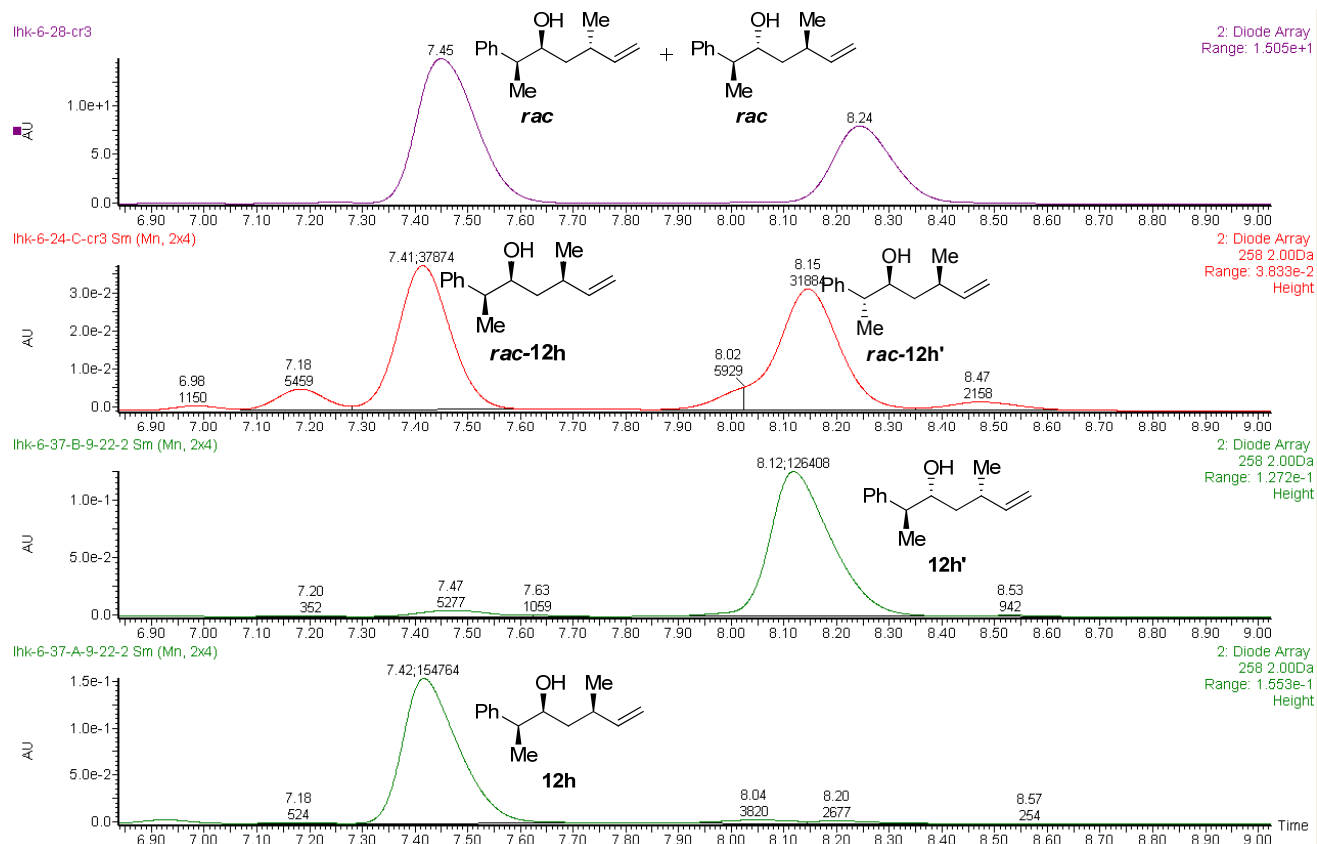

## <sup>1</sup>H-NMR overlay of 12h/12h' samples used in dr analysis

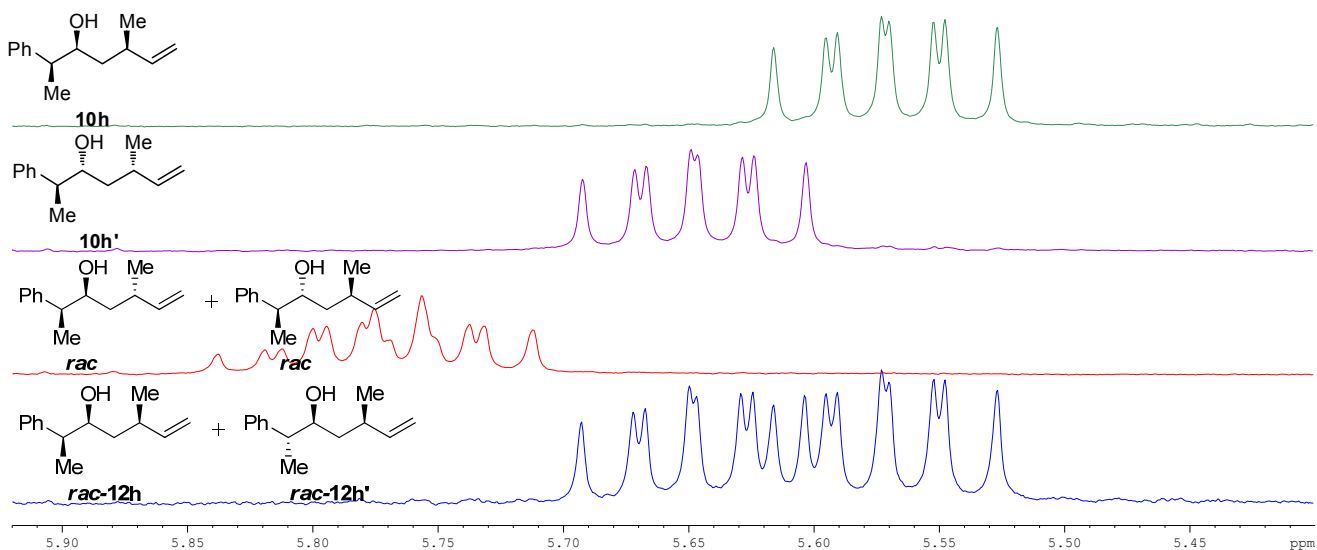

# GC-MS chromatogram of 12i'

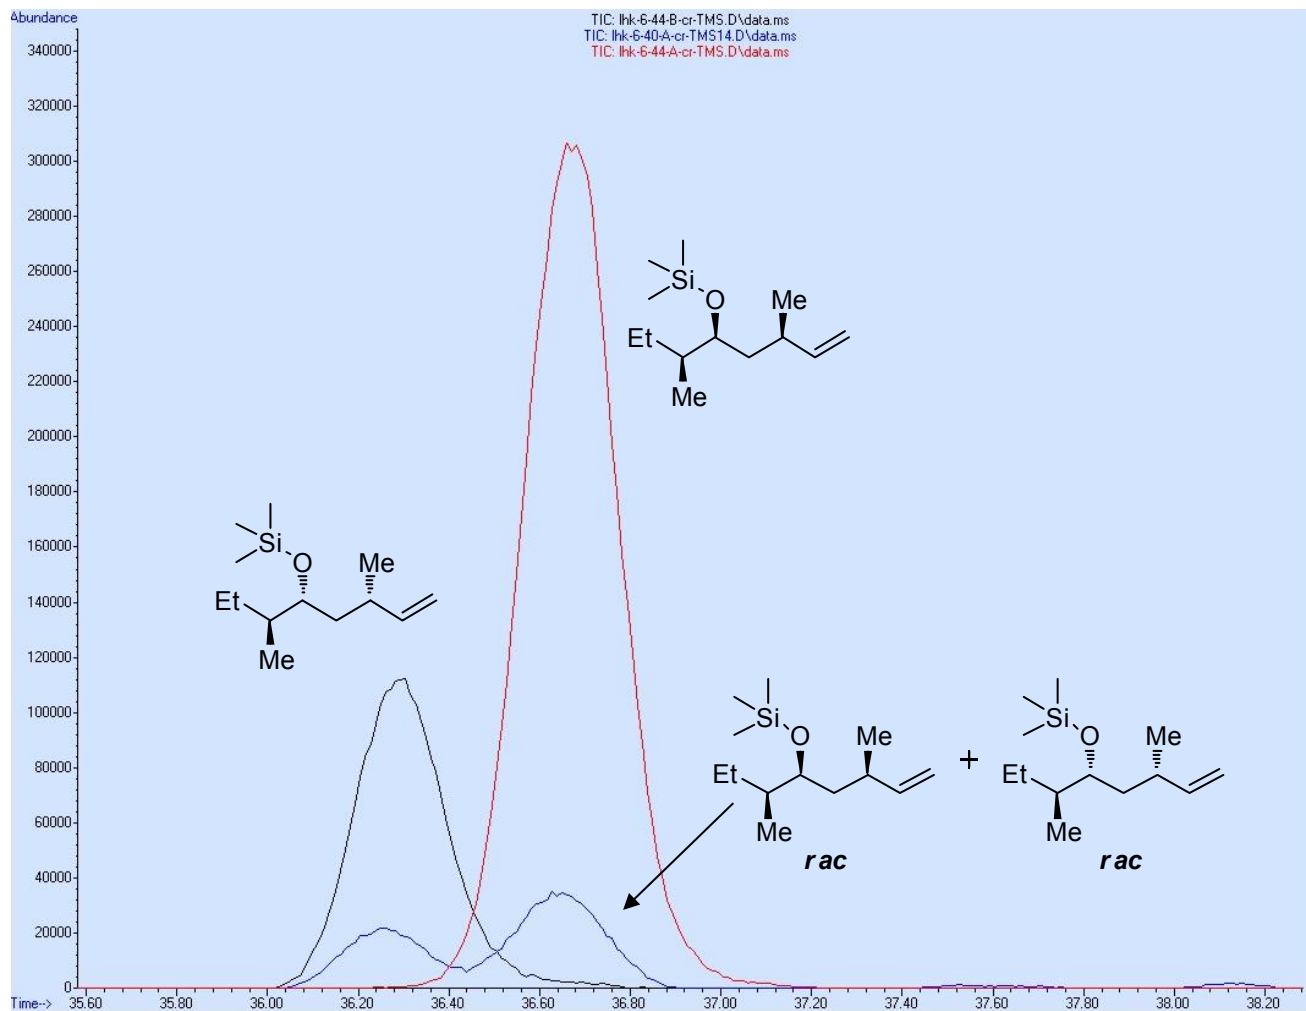

## General Computational Methods

All calculations were performed with the Gaussian 09 package.<sup>1</sup> Geometries were fully optimized in the gas phase and characterized by frequency calculations using B3LYP functional and 6-31G\* basis set. Free energies were calculated for each stationary point.

Reference 1:

Gaussian 09, Revision B.01, M. J. Frisch, G. W. Trucks, H. B. Schlegel, G. E. Scuseria, M. A. Robb, J. R. Cheeseman, G. Scalmani, V. Barone, B. Mennucci, G. A. Petersson, H. Nakatsuji, M. Caricato, X. Li, H. P. Hratchian, A. F. Izmaylov, J. Bloino, G. Zheng, J. L. Sonnenberg, M. Hada, M. Ehara, K. Toyota, R. Fukuda, J. Hasegawa, M. Ishida, T. Nakajima, Y. Honda, O. Kitao, H. Nakai, T. Vreven, J. A. Montgomery, Jr., J. E. Peralta, F. Ogliaro, M. Bearpark, J. J. Heyd, E. Brothers, K. N. Kudin, V. N. Staroverov, R. Kobayashi, J. Normand, K. Raghavachari, A. Rendell, J. C. Burant, S. S. Iyengar, J. Tomasi, M. Cossi, N. Rega, J. M. Millam, M. Klene, J. E. Knox, J. B. Cross, V. Bakken, C. Adamo, J. Jaramillo, R. Gomperts, R. E. Stratmann, O. Yazyev, A. J. Austin, R. Cammi, C. Pomelli, J. W. Ochterski, R. L. Martin, K. Morokuma, V. G. Zakrzewski, G. A. Voth, P. Salvador, J. J. Dannenberg, S. Dapprich, A. D. Daniels, O. Farkas, J. B. Foresman, J. V. Ortiz, J. Cioslowski, and D. J. Fox, Gaussian, Inc., Wallingford CT, 2010.

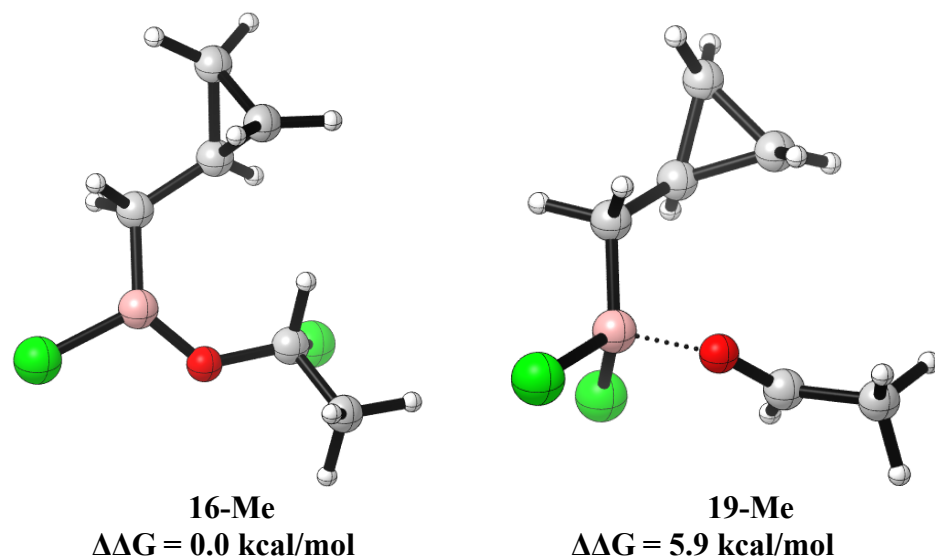

Figure S1. Optimized structures of 16 and 19.

## Cartesian coordinates of stationary points

### TS-O

|                                               |             |             |             |
|-----------------------------------------------|-------------|-------------|-------------|
| B                                             | 0.33011272  | -0.09661836 | 0.00000000  |
| C                                             | 1.47924472  | -1.32190536 | -0.04057100 |
| C                                             | 2.64816172  | -1.00573336 | 0.76075300  |
| C                                             | 3.64915172  | 0.46982664  | 0.16505600  |
| H                                             | 0.92697772  | -2.11826136 | 0.47369900  |
| H                                             | 1.72856172  | -1.63790936 | -1.05777200 |
| C                                             | 4.02667272  | -1.04068836 | 0.33101000  |
| H                                             | 4.78671272  | -1.21717036 | 1.08984200  |
| H                                             | 4.23259672  | -1.55119736 | -0.60820500 |
| H                                             | 2.47143572  | -0.82622636 | 1.81977000  |
| H                                             | 4.27480172  | 1.06468564  | 0.82424100  |
| H                                             | 3.71730172  | 0.72916264  | -0.88707300 |
| C                                             | 2.05417272  | 1.55975864  | 0.40676900  |
| H                                             | 1.85497272  | 1.42317964  | 1.47416900  |
| C                                             | 2.62947372  | 2.91676164  | 0.04999800  |
| H                                             | 1.84384672  | 3.66348864  | 0.21424700  |
| H                                             | 3.48939872  | 3.18256264  | 0.67183900  |
| H                                             | 2.91271972  | 2.95749664  | -1.00600500 |
| O                                             | 1.10134372  | 1.16700964  | -0.40042300 |
| O                                             | -0.68145928 | -0.34773136 | -0.97422300 |
| O                                             | -0.10804728 | 0.02022964  | 1.38263700  |
| C                                             | -1.29984928 | 0.75977864  | 1.58157300  |
| C                                             | -1.87810528 | 0.39054064  | -0.82237600 |
| C                                             | -2.39995628 | 0.30985264  | 0.61610500  |
| H                                             | -2.61485128 | -0.01572636 | -1.52729000 |
| H                                             | -1.71647728 | 1.44926164  | -1.09358200 |
| H                                             | -3.29596628 | 0.93410564  | 0.73819000  |
| H                                             | -2.67544928 | -0.72806436 | 0.84198400  |
| H                                             | -1.11560828 | 1.84079164  | 1.43923000  |
| H                                             | -1.61226128 | 0.62056364  | 2.62499700  |
| Sum of electronic and zero-point Energies=    |             |             | -603.460589 |
| Sum of electronic and thermal Energies=       |             |             | -603.447974 |
| Sum of electronic and thermal Enthalpies=     |             |             | -603.447030 |
| Sum of electronic and thermal Free Energies=  |             |             | -603.498727 |
| Imaginary frequency: -496.76 cm <sup>-1</sup> |             |             |             |

### TS-CI

|    |             |             |             |
|----|-------------|-------------|-------------|
| B  | 0.49114331  | 0.12882448  | 0.00000000  |
| C  | 1.32543031  | -1.27966152 | -0.21757700 |
| C  | 2.62761131  | -1.25138852 | 0.46276200  |
| C  | 3.76477931  | 0.00618448  | -0.19187900 |
| H  | 0.71830931  | -2.05446252 | 0.26704800  |
| H  | 1.43075631  | -1.53228852 | -1.27848500 |
| C  | 3.89072631  | -1.58547752 | -0.12429400 |
| H  | 4.69691231  | -1.91136352 | 0.52733100  |
| H  | 3.88780831  | -2.05589052 | -1.10450300 |
| H  | 2.60434131  | -1.10855152 | 1.54175900  |
| H  | 4.59881931  | 0.40551248  | 0.37666800  |
| H  | 3.75281831  | 0.27182548  | -1.24441400 |
| Cl | 0.00948031  | 0.25432548  | 1.84723000  |
| Cl | -0.99117969 | 0.21028748  | -1.10180800 |
| C  | 2.54123731  | 1.35360248  | 0.31072000  |
| H  | 2.46862831  | 1.21269548  | 1.39259600  |
| C  | 3.30216131  | 2.60050448  | -0.09322200 |

|                                              |                          |            |              |
|----------------------------------------------|--------------------------|------------|--------------|
| H                                            | 2.70176331               | 3.46293548 | 0.21667600   |
| H                                            | 4.27786931               | 2.66554348 | 0.39613800   |
| H                                            | 3.42766731               | 2.65097748 | -1.17868900  |
| O                                            | 1.40230431               | 1.22580148 | -0.35022300  |
| Sum of electronic and zero-point Energies=   |                          |            | -1255.592233 |
| Sum of electronic and thermal Energies=      |                          |            | -1255.581620 |
| Sum of electronic and thermal Enthalpies=    |                          |            | -1255.580676 |
| Sum of electronic and thermal Free Energies= |                          |            | -1255.628261 |
| Imaginary frequency:                         | -421.09 cm <sup>-1</sup> |            |              |

## TS-LA

|                                            |             |             |              |
|--------------------------------------------|-------------|-------------|--------------|
| B                                          | 0.04025765  | 0.16103060  | 0.00000000   |
| C                                          | -0.62250635 | -1.18034740 | -0.66250600  |
| C                                          | -2.08650035 | -1.16890940 | -0.48612400  |
| C                                          | -2.60657335 | -1.29797740 | 1.22323400   |
| H                                          | -0.43687435 | -1.08875140 | -1.74059700  |
| H                                          | -0.19383635 | -2.12106840 | -0.31830300  |
| C                                          | -2.86453535 | -2.27669840 | -0.02344700  |
| H                                          | -3.91544635 | -2.33228240 | -0.29337100  |
| H                                          | -2.36829235 | -3.23735640 | 0.08529400   |
| H                                          | -2.62886335 | -0.32804940 | -0.91496800  |
| H                                          | -3.58913135 | -1.00199340 | 1.57709400   |
| H                                          | -1.99841535 | -1.85171840 | 1.93148300   |
| C                                          | -1.77571135 | 0.36179460  | 1.57218300   |
| H                                          | -2.29221835 | 1.02517960  | 0.87021400   |
| C                                          | -2.16878335 | 0.58257460  | 3.02042200   |
| H                                          | -1.76776035 | 1.55526360  | 3.32746200   |
| H                                          | -3.25363935 | 0.59992760  | 3.15672300   |
| H                                          | -1.72599935 | -0.18124640 | 3.66568500   |
| O                                          | -0.47048535 | 0.26981860  | 1.40899000   |
| O                                          | 1.58266565  | 0.12103160  | 0.18935300   |
| O                                          | -0.34993535 | 1.28031260  | -0.80458500  |
| B                                          | 2.50387065  | -1.16750340 | 0.28852300   |
| Cl                                         | 1.72742865  | -2.29404740 | 1.59734300   |
| Cl                                         | 2.39499265  | -1.98615640 | -1.40455500  |
| C                                          | 4.02131265  | -0.78023140 | 0.65524600   |
| C                                          | 4.49698065  | -0.79260540 | 1.97966800   |
| C                                          | 4.93156765  | -0.38111440 | -0.34308100  |
| C                                          | 5.80635865  | -0.42377340 | 2.29440700   |
| H                                          | 3.83137065  | -1.10851940 | 2.77739600   |
| C                                          | 6.24124465  | -0.00785840 | -0.03743900  |
| H                                          | 4.60987365  | -0.37642740 | -1.38067000  |
| C                                          | 6.68526365  | -0.02702540 | 1.28592200   |
| H                                          | 6.14131665  | -0.45280940 | 3.32884300   |
| H                                          | 6.91821865  | 0.28939860  | -0.83515600  |
| H                                          | 7.70686965  | 0.25711660  | 1.52701400   |
| C                                          | 0.15253165  | 2.55854460  | -0.45842400  |
| C                                          | 2.07908265  | 1.41802960  | 0.66599500   |
| C                                          | 1.67086765  | 2.50882160  | -0.31406700  |
| H                                          | -0.14714235 | 3.25901360  | -1.24644800  |
| H                                          | -0.29498535 | 2.91261160  | 0.48662900   |
| H                                          | 2.05779265  | 3.47012160  | 0.04934700   |
| H                                          | 2.13099265  | 2.30627660  | -1.28802900  |
| H                                          | 1.65386065  | 1.58391460  | 1.66110800   |
| H                                          | 3.15833965  | 1.33842960  | 0.74950200   |
| Sum of electronic and zero-point Energies= |             |             | -1780.368915 |
| Sum of electronic and thermal Energies=    |             |             | -1780.347307 |

Sum of electronic and thermal Enthalpies= -1780.346363  
 Sum of electronic and thermal Free Energies= -1780.439773  
 Imaginary frequency: -396.63 cm<sup>-1</sup>

**TS-2**

|    |             |             |             |
|----|-------------|-------------|-------------|
| B  | 0.49114331  | 0.01610306  | 0.00000000  |
| C  | 1.66225731  | -1.04980894 | -0.42463200 |
| C  | 2.96250731  | -0.71512694 | 0.20615700  |
| C  | 3.58018131  | 0.83950006  | -0.29514700 |
| H  | 1.35814631  | -2.03252794 | -0.04408600 |
| H  | 1.76353931  | -1.12472994 | -1.51419600 |
| C  | 4.22866631  | -0.69092394 | -0.44398100 |
| H  | 2.97289431  | -0.71201494 | 1.29637500  |
| H  | 4.34677831  | 1.36248206  | 0.26852200  |
| H  | 3.46936531  | 1.16114706  | -1.32619200 |
| Cl | 0.13704731  | -0.19825994 | 1.87466700  |
| Cl | -1.04319269 | -0.21500994 | -1.01056300 |
| C  | 2.12922931  | 1.74517706  | 0.36835000  |
| H  | 2.16848931  | 1.49729606  | 1.43369000  |
| C  | 2.48188531  | 3.19085306  | 0.07136000  |
| H  | 1.68880831  | 3.81510506  | 0.49718100  |
| H  | 3.43375831  | 3.48457106  | 0.52326000  |
| H  | 2.51144231  | 3.37409606  | -1.00678100 |
| O  | 1.01597331  | 1.36842606  | -0.24837500 |
| C  | 5.53339131  | -0.90150894 | 0.28715700  |
| H  | 5.79026631  | -1.96768394 | 0.27358500  |
| H  | 6.35280431  | -0.35345594 | -0.18982300 |
| H  | 5.46390631  | -0.58623094 | 1.33352000  |
| H  | 4.23310431  | -0.97248194 | -1.49560100 |

Sum of electronic and zero-point Energies= -1294.883532  
 Sum of electronic and thermal Energies= -1294.871195  
 Sum of electronic and thermal Enthalpies= -1294.870251  
 Sum of electronic and thermal Free Energies= -1294.921639  
 Imaginary frequency: -341.02 cm<sup>-1</sup>

**TS-4**

|    |             |             |             |
|----|-------------|-------------|-------------|
| B  | -0.33011272 | -0.01610306 | 0.00000000  |
| C  | -1.10188572 | -1.40478406 | -0.45052900 |
| C  | -2.45750072 | -1.48242406 | 0.08420700  |
| C  | -3.74578972 | -0.14823106 | -0.32862000 |
| H  | -0.51871572 | -2.20611206 | 0.02148600  |
| H  | -1.07699472 | -1.53471306 | -1.53683100 |
| C  | -3.66165772 | -1.68087606 | -0.67933000 |
| H  | -4.47262872 | -2.25317406 | -0.22973100 |
| H  | -3.52790472 | -1.89025806 | -1.73913900 |
| H  | -2.54592872 | -1.52733306 | 1.16817200  |
| Cl | -0.11381572 | -0.01800506 | 1.89375800  |
| Cl | 1.28988228  | 0.16172694  | -0.87430800 |
| C  | -2.39233472 | 1.24470194  | 0.13881400  |
| H  | -2.42779872 | 1.11016294  | 1.22245800  |
| C  | -3.06726872 | 2.49034494  | -0.39840700 |
| H  | -2.52456772 | 3.35409094  | 0.00317100  |
| H  | -4.11456072 | 2.58219694  | -0.10655300 |
| H  | -2.98244672 | 2.52175394  | -1.48852000 |
| O  | -1.21171672 | 1.07482394  | -0.41755600 |
| H  | -3.87390272 | 0.35395494  | -1.28405100 |
| C  | -4.83282572 | 0.07374394  | 0.71603300  |



|                                               |             |             |              |
|-----------------------------------------------|-------------|-------------|--------------|
| H                                             | -4.83505172 | 1.08349894  | 1.13466800   |
| H                                             | -5.82363872 | -0.11352406 | 0.28380900   |
| H                                             | -4.70759972 | -0.61972106 | 1.55565500   |
| Sum of electronic and zero-point Energies=    |             |             | -1294.872834 |
| Sum of electronic and thermal Energies=       |             |             | -1294.860782 |
| Sum of electronic and thermal Enthalpies=     |             |             | -1294.859838 |
| Sum of electronic and thermal Free Energies=  |             |             | -1294.910468 |
| Imaginary frequency: -436.40 cm <sup>-1</sup> |             |             |              |

## TS-6

|                                               |             |             |              |
|-----------------------------------------------|-------------|-------------|--------------|
| B                                             | 0.13687600  | -0.22542352 | -0.00295096  |
| C                                             | 1.33142100  | -1.25307052 | 0.44490404   |
| C                                             | 2.64589700  | -0.56707752 | 0.56078104   |
| C                                             | 3.18674900  | 0.00846248  | -0.96709696  |
| H                                             | 1.06976800  | -1.63598752 | 1.43867604   |
| H                                             | 1.40584600  | -2.11032852 | -0.23553196  |
| C                                             | 3.89247600  | -1.07952752 | 0.10441904   |
| H                                             | 2.69350000  | 0.25931048  | 1.26901904   |
| H                                             | 3.98713700  | 0.72988748  | -1.10156396  |
| H                                             | 2.97697400  | -0.61042252 | -1.83342796  |
| Cl                                            | -0.30162300 | 0.88806748  | 1.49478904   |
| Cl                                            | -1.36711200 | -1.15895952 | -0.57353396  |
| C                                             | 1.79684300  | 1.19011748  | -1.18834596  |
| O                                             | 0.62719500  | 0.56809848  | -1.14240196  |
| C                                             | 2.03365200  | 2.41942748  | -0.32293396  |
| H                                             | 3.02717500  | 2.83791048  | -0.51697496  |
| H                                             | 1.28333900  | 3.16367248  | -0.61238796  |
| H                                             | 1.90002200  | 2.23475748  | 0.74219704   |
| H                                             | 2.05790100  | 1.40188948  | -2.23187996  |
| C                                             | 5.22094800  | -0.64637552 | 0.67417304   |
| H                                             | 5.50572800  | -1.32794552 | 1.48505904   |
| H                                             | 6.01304800  | -0.67805552 | -0.08137796  |
| H                                             | 5.17223700  | 0.36592548  | 1.08852504   |
| H                                             | 3.87525400  | -2.06962052 | -0.34732296  |
| Sum of electronic and zero-point Energies=    |             |             | -1294.874905 |
| Sum of electronic and thermal Energies=       |             |             | -1294.862621 |
| Sum of electronic and thermal Enthalpies=     |             |             | -1294.861677 |
| Sum of electronic and thermal Free Energies=  |             |             | -1294.912941 |
| Imaginary frequency: -326.72 cm <sup>-1</sup> |             |             |              |

## 16

|    |             |             |             |
|----|-------------|-------------|-------------|
| B  | -0.28180354 | 0.41867956  | 0.00000000  |
| C  | 1.11045446  | -0.22892244 | -0.37517000 |
| C  | 1.34870746  | -1.72791444 | -0.27505800 |
| C  | 1.75862446  | -2.36036144 | 1.03932600  |
| H  | 1.32615846  | 0.10698856  | -1.40290700 |
| H  | 1.86260046  | 0.29928656  | 0.23069000  |
| C  | 2.75234946  | -2.25022144 | -0.09270600 |
| H  | 3.03890446  | -3.15889944 | -0.61501700 |
| H  | 3.55543646  | -1.52373244 | 0.00669000  |
| H  | 0.71074146  | -2.33446844 | -0.91468100 |
| H  | 1.37405546  | -3.34575544 | 1.29133100  |
| H  | 1.89608146  | -1.70680044 | 1.89815500  |
| Cl | -0.35377754 | 2.21294356  | -0.04292600 |
| C  | -1.76085354 | -1.50595344 | 0.49062800  |
| C  | -2.91715054 | -1.66462244 | 1.45452200  |
| H  | -3.18792654 | -2.71799044 | 1.55928200  |

|                                              |             |             |              |
|----------------------------------------------|-------------|-------------|--------------|
| H                                            | -2.61820054 | -1.27268344 | 2.43305900   |
| H                                            | -3.78401854 | -1.10112344 | 1.10005000   |
| O                                            | -1.46587154 | -0.14126644 | 0.35747400   |
| Cl                                           | -2.22488854 | -2.18998744 | -1.15315300  |
| H                                            | -0.88023954 | -2.07392044 | 0.78483100   |
| Sum of electronic and zero-point Energies=   |             |             | -1255.633572 |
| Sum of electronic and thermal Energies=      |             |             | -1255.621895 |
| Sum of electronic and thermal Enthalpies=    |             |             | -1255.620950 |
| Sum of electronic and thermal Free Energies= |             |             | -1255.673056 |

## 19

|                                              |             |             |              |
|----------------------------------------------|-------------|-------------|--------------|
| B                                            | -0.57165861 | 0.61191628  | 0.00000000   |
| C                                            | 0.79195439  | -0.13977972 | -0.37328300  |
| C                                            | 2.03439639  | 0.30662528  | 0.38103500   |
| C                                            | 2.89716939  | 1.44292228  | -0.13597900  |
| H                                            | 0.62135439  | -1.21089172 | -0.19315000  |
| H                                            | 0.96389739  | -0.04489972 | -1.45516900  |
| C                                            | 3.41222939  | 0.02282628  | -0.16270700  |
| H                                            | 4.20072839  | -0.25094072 | 0.53342100   |
| H                                            | 3.48348639  | -0.47006772 | -1.12924700  |
| H                                            | 1.94411139  | 0.24844228  | 1.46436000   |
| H                                            | 3.34371939  | 2.13554628  | 0.57448200   |
| H                                            | 2.63047139  | 1.89447128  | -1.08951900  |
| Cl                                           | -0.98098961 | 0.60677028  | 1.82515400   |
| Cl                                           | -2.02150661 | 0.14019828  | -1.03766800  |
| C                                            | -0.15924361 | 3.12556328  | 0.32165200   |
| H                                            | -0.23461861 | 2.96549528  | 1.40331100   |
| C                                            | 0.13549739  | 4.47519228  | -0.21563300  |
| H                                            | -0.61463761 | 5.18432728  | 0.15844500   |
| H                                            | 1.10380139  | 4.81157628  | 0.17905900   |
| H                                            | 0.15040239  | 4.47630528  | -1.30669100  |
| O                                            | -0.33203761 | 2.16037328  | -0.43199100  |
| Sum of electronic and zero-point Energies=   |             |             | -1255.623634 |
| Sum of electronic and thermal Energies=      |             |             | -1255.611280 |
| Sum of electronic and thermal Enthalpies=    |             |             | -1255.610336 |
| Sum of electronic and thermal Free Energies= |             |             | -1255.663576 |
